# Supplementary material
Source: PubMed Central journal article supplement (PMC4830686)
Supplement: NIHMS702153-supplement-2.pdf [file NIHMS702153-supplement-2.pdf]

**Supplementary Table 1** *Clinical information on cases included in this study*

| Group                                      | Sample # | Clinical diagnosis   | Pathological diagnosis | Sex      | Race            | Motor neuron disease |                      |                   | Age of death (years) | PMI (hours) | Braak stage | TDP-43 pathology | TDP-43 type | FHx MND  | FHx FTD  | FHx Neurodegeneration |
|--------------------------------------------|----------|----------------------|------------------------|----------|-----------------|----------------------|----------------------|-------------------|----------------------|-------------|-------------|------------------|-------------|----------|----------|-----------------------|
|                                            |          |                      |                        |          |                 | Site of onset        | Age of onset (years) | Duration (months) |                      |             |             |                  |             |          |          |                       |
| Non-neurological disease control (control) | 24       | Healthy              | Normal                 | F        | White/ED        | n/a                  | n/a                  | n/a               | 64.9                 | 30          | 1           | 0                | 0           | no       | no       | yes                   |
|                                            | 86       | Healthy              | Normal                 | M        | White/ED        | n/a                  | n/a                  | n/a               | 76.6                 | 18          | 2           | 0                | 0           | no       | no       | no                    |
|                                            | 90       | Healthy              | Normal                 | F        | White/ED        | n/a                  | n/a                  | n/a               | 62.1                 | 2           | 0           | 0                | 0           | no       | no       | no                    |
|                                            | 91       | Healthy              | Normal                 | F        | White/ED        | n/a                  | n/a                  | n/a               | 72.9                 | 18          | 1           | 0                | 0           | no       | no       | no                    |
|                                            | 93       | Healthy              | Normal                 | M        | White/ED        | n/a                  | n/a                  | n/a               | 80.8                 | 15          | 1           | 0                | 0           | no       | no       | yes                   |
|                                            | 94       | aMCI                 | Normal                 | M        | White/ED        | n/a                  | n/a                  | n/a               | 75.1                 | 17          | 0           | n/a              | n/a         | n/a      | n/a      | n/a                   |
|                                            | 95       | Healthy (depression) | Normal                 | M        | White/ED        | n/a                  | n/a                  | n/a               | 78.2                 | 13          | 2           | 0                | 0           | no       | no       | yes                   |
|                                            | 97       | Healthy (depression) | Normal                 | M        | Hispanic/Latino | n/a                  | n/a                  | n/a               | 78.3                 | 8           | 2.5         | 0                | 0           | no       | no       | yes                   |
| 100†                                       | Healthy  | Normal               | M                      | White/ED | n/a             | n/a                  | n/a                  | 55                | 13                   | 0           | n/a         | n/a              | n/a         | n/a      | n/a      |                       |
| Other disease control                      | 20       | AD                   | PA                     | M        | White/ED        | n/a                  | 72                   | 112               | 81                   | 9           | 3           | 0                | 0           | no       | no       | no                    |
|                                            | 23       | AD                   | AGD/Fahr               | M        | White/ED        | n/a                  | 72                   | 50                | 75                   | 10          | 3           | 0                | 0           | no       | no       | no                    |
|                                            | 25       | CBD                  | Vascular disease       | M        | White/ED        | n/a                  | 63                   | 79                | 69                   | 8           | 2           | 0                | 0           | n/a      | n/a      | n/a                   |
| sALS                                       | 11       | ALS                  | ALS/PA                 | F        | White/ED        | Bulbar               | 60.2                 | 15.1              | 61.4                 | 10          | 2           | 1                | ALS         | no       | no       | no                    |
|                                            | 12       | ALS                  | ALS                    | M        | White/ED        | Upper limbs          | 45.2                 | 59.0              | 50.1                 | 9           | 1           | 1                | ALS         | no       | no       | no                    |
|                                            | 13       | ALS                  | ALS                    | M        | White/ED        | Upper limbs          | 49.9                 | 46.8              | 53.8                 | 6           | 1           | 1                | ALS         | no       | no       | no                    |
|                                            | 14       | ALS                  | ALS/SC                 | M        | White/ED        | Lower limbs          | 61.2                 | 64.1              | 66.6                 | 13          | 1           | 1                | ALS         | no       | no       | no                    |
|                                            | 70       | ALS                  | ALS                    | F        | White/ED        | Upper limbs          | 48.8                 | 53.9              | 53.2                 | 16          | 0           | 1                | ALS         | no       | no       | no                    |
|                                            | 71       | ALS                  | ALS                    | M        | White/ED        | Upper limbs          | 45.4                 | 24.6              | 47.5                 | 5           | 4           | 1                | ALS         | possible | no       | no                    |
|                                            | 72       | ALS                  | ALS/PA                 | F        | White/ED        | Bulbar               | 57.6                 | 39.0              | 60.9                 | 16          | 0           | 1                | ALS         | possible | possible | no                    |
|                                            | 73       | ALS                  | ALS/SC                 | F        | White/ED        | Upper limbs          | 64.1                 | 12.6              | 65.2                 | 7           | 1           | 1                | ALS         | no       | no       | yes                   |
| 74                                         | ALS      | ALS                  | F                      | White/ED | Upper limbs     | 66.5                 | 31.9                 | 69.2              | 3                    | 0.5         | 1           | ALS              | no          | no       | no       |                       |
| 75                                         | ALS      | ALS                  | F                      | White/ED | Bulbar          | 67.2                 | 38.1                 | 70.4              | 12                   | 2           | 1           | ALS              | no          | no       | no       |                       |
| c9ALS                                      | 1        | Bulbar palsy         | ALS/PA                 | F        | White/ED        | Bulbar               | 62.5                 | 21.7              | 64.3                 | 15          | 2           | 1                | ALS         | no       | no       | no                    |
|                                            | 2        | ALS                  | ALS                    | M        | White/ED        | Bulbar               | 56.1                 | 26.8              | 58.3                 | 6           | 1.5         | 1                | ALS         | no       | no       | no                    |
|                                            | 6        | ALS                  | ALS                    | M        | White/ED        | Upper limbs          | 52.3                 | 76.4              | 58.7                 | 18          | 1           | 1                | ALS         | yes      | no       | yes                   |
|                                            | 7        | ALS-MCI              | ALS                    | M        | White/ED        | Bulbar               | 49.5                 | 49.6              | 53.6                 | 7           | 0.5         | 1                | ALS         | possible | no       | no                    |
|                                            | 34       | ALS                  | ALS                    | F        | White/ED        | Bulbar               | 47.3                 | 34.0              | 50.2                 | 8           | 0.5         | 1                | ALS         | no       | no       | yes                   |
|                                            | 42*      | ALS                  | ALS                    | F        | White/ED        | Upper limbs          | 48.4                 | 10.8              | 49.3                 | 5           | 2           | 1                | ALS         | no       | no       | yes                   |
|                                            | 57       | ALS                  | ALS                    | F        | White/ED        | Lower limbs          | 49.7                 | 15.3              | 51.0                 | 18          | 0.5         | 1                | ALS         | no       | no       | no                    |
|                                            | 62       | ALS                  | ALS                    | F        | White/ED        | Lower limbs          | 41.3                 | 15.2              | 42.6                 | 3           | 2           | 1                | ALS         | adopted  | adopted  | adopted               |
| 63                                         | ALS      | ALS                  | F                      | White/ED | Lower limbs     | 45.6                 | 47.2                 | 49.5              | 6                    | 0.5         | 1           | ALS              | yes         | no       | no       |                       |
| PSP                                        | 283      | PSP                  | PSP/PA                 | F        | White/ED        | n/a                  | n/a                  | n/a               | 60                   | 18          | 2           | 0                | 0           | no       | no       | no                    |
|                                            | 285      | PSP                  | PSP/AGD                | F        | White/ED        | n/a                  | n/a                  | n/a               | 57                   | 5           | 4           | 0                | 0           | n/a      | n/a      | n/a                   |
|                                            | 286      | PSP                  | PSP                    | M        | White/ED        | n/a                  | n/a                  | n/a               | 57                   | 4           | 2           | 0                | 0           | adopted  | adopted  | adopted               |
|                                            | 287      | PSP                  | PSP                    | F        | White/ED        | n/a                  | n/a                  | n/a               | 59                   | 7           | 1           | 0                | 0           | no       | no       | no                    |
|                                            | 288      | PSP                  | PSP                    | M        | White/ED        | n/a                  | n/a                  | n/a               | 64                   | 5           | 1           | 0                | 0           | no       | no       | no                    |
|                                            | 290      | PSP                  | PSP/AGD                | F        | White/ED        | n/a                  | n/a                  | n/a               | 60                   | 7           | 1           | 0                | 0           | no       | no       | no                    |
|                                            | 291      | PSP                  | PSP                    | F        | White/ED        | n/a                  | n/a                  | n/a               | 59                   | 9           | 1           | 0                | 0           | no       | no       | no                    |
|                                            | 292      | PSP                  | PSP                    | M        | White/ED        | n/a                  | n/a                  | n/a               | 58                   | 6           | 0           | 0                | 0           | np       | np       | np                    |
|                                            | 293      | PSP                  | PSP                    | M        | White/ED        | n/a                  | n/a                  | n/a               | 52                   | 10          | 0.5         | 0                | 0           | no       | no       | no                    |
|                                            | 294      | PSP                  | PSP                    | F        | White/ED        | n/a                  | n/a                  | n/a               | 57                   | 6           | 1           | 0                | 0           | yes      | no       | no                    |
|                                            | 295      | PSP                  | PSP                    | F        | White/ED        | n/a                  | n/a                  | n/a               | 59                   | 5           | 1           | 0                | 0           | no       | no       | Yes                   |
| 296                                        | PSP      | PSP                  | F                      | White/ED | n/a             | n/a                  | n/a                  | 64                | 4                    | 2           | 0           | 0                | no          | no       | no       |                       |
| 298                                        | PSP      | PSP                  | M                      | White/ED | n/a             | n/a                  | n/a                  | 59                | 12                   | 2           | 0           | 0                | no          | no       | no       |                       |

ALS: amyotrophic lateral sclerosis; aMCI: amnesic mild cognitive impairment; ED: European-descent; F: female; FCx: frontal cortex; FHx: family history; FTD: frontotemporal dementia; M: male; MCI: mild cognitive impairment; MND: motor neuron disease; PA: pathological aging; PMI: post-mortem interval; PSP: progressive supranuclear palsy; SC: senile change; n/a: not available. \*: case #42 was not included in the RNAseq analyses but was included in qRT-PCRs for expression and AS validations. †: frontal cortex tissue from case #100 was used for RNAseq studies but cerebellar tissue from this case was unavailable. Note three “other disease control” cases were included in qRT-PCR validations in the motor cortex tissues only due to the unavailability of motor cortex tissues for non-neurological disease control cases #91 and #93.

Supplementary Table 2 Notable biological processes involving c9ALS differentially expressed genes

|                                                | Cluster ID<br>(Enrichment score)                   | GO term ID                                      | Count    | P value  | Total genes<br>in cluster                                                                                                                                                                                                                     | Genes                                                                                                                                                                                                                  |
|------------------------------------------------|----------------------------------------------------|-------------------------------------------------|----------|----------|-----------------------------------------------------------------------------------------------------------------------------------------------------------------------------------------------------------------------------------------------|------------------------------------------------------------------------------------------------------------------------------------------------------------------------------------------------------------------------|
| CEREBELLUM                                     | Inflammatory response<br>(5.165)                   | GO:006954 Inflammatory response                 | 19       | 2.40E-06 | 30                                                                                                                                                                                                                                            | C7, C9, CCL22, CCL26, CCR2, CCR5, CD163, COL3A1, CR1, CRH, CXCL6, DRD5, F13A1, FCGR1C, FCN2, HIST1H2BJ, HMOX1, IL1RL2, LY6G6D, LYVE1, MMRN1, PLA2G2A, S100A12, S100A8, S100A9, SELE, SERPINA1, SERPINA3, SH2D1A, VSIG4 |
|                                                |                                                    | GO:0009611 Response to wounding                 | 24       | 6.03E-06 |                                                                                                                                                                                                                                               |                                                                                                                                                                                                                        |
|                                                |                                                    | GO:0006952 Defense response                     | 25       | 2.20E-05 |                                                                                                                                                                                                                                               |                                                                                                                                                                                                                        |
|                                                | Development<br>(4.002)                             | GO:001501 Skeletal system development           | 23       | 3.35E-09 | 28                                                                                                                                                                                                                                            | BMP5, COL3A1, DLX6, GATA4, HAND1, HOXA10, HOXA11, HOXA13, HOXA3, HOXA4, HOXA5, HOXA6, HOXB6, HOXC10, HOXC11, HOXC13, HOXD10, HOXD8, HOXD9, IBSF, MEPE, MGP, ÖVOL2, PDX1, PITX1, SHOX2, SIX1, STC1                      |
|                                                |                                                    | GO:0009952 Anterior/posterior pattern formation | 14       | 2.13E-07 |                                                                                                                                                                                                                                               |                                                                                                                                                                                                                        |
|                                                |                                                    | GO:0048598 Embryonic morphogenesis              | 18       | 4.67E-06 |                                                                                                                                                                                                                                               |                                                                                                                                                                                                                        |
|                                                |                                                    | GO:0009954 Proximal/distal pattern formation    | 6        | 2.10E-05 |                                                                                                                                                                                                                                               |                                                                                                                                                                                                                        |
|                                                |                                                    | GO:0035107 Appendage morphogenesis              | 9        | 1.32E-04 |                                                                                                                                                                                                                                               |                                                                                                                                                                                                                        |
|                                                |                                                    | GO:0035108 Limb morphogenesis                   | 9        | 1.32E-04 |                                                                                                                                                                                                                                               |                                                                                                                                                                                                                        |
|                                                |                                                    | GO:0060173 Limb development                     | 9        | 1.74E-04 |                                                                                                                                                                                                                                               |                                                                                                                                                                                                                        |
| GO:0048736 Appendage development               |                                                    | 9                                               | 1.74E-04 |          |                                                                                                                                                                                                                                               |                                                                                                                                                                                                                        |
| GO:0035113 Embryonic appendage morphogenesis   |                                                    | 8                                               | 3.58E-04 |          |                                                                                                                                                                                                                                               |                                                                                                                                                                                                                        |
| Morphogenesis<br>(3.830)                       | GO:001501 Skeletal system development              | 23                                              | 3.35E-09 | 34       | BMP5, COL3A1, CSDAP1, DLX6, FOXJ1, GATA4, GATA6, HAND1, HOXA10, HOXA11, HOXA13, HOXA3, HOXA4, HOXA5, HOXA6, HOXB6, HOXC10, HOXC11, HOXC13, HOXD10, HOXD8, HOXD9, IBSF, LEFTY2, MEPE, MGP, NLRP5, OVOL2, PDX1, PITX1, PITX2, SHOX2, SIX1, STC1 |                                                                                                                                                                                                                        |
|                                                | GO:0007389 Pattern specification process           | 20                                              | 2.55E-08 |          |                                                                                                                                                                                                                                               |                                                                                                                                                                                                                        |
|                                                | GO:0009952 Anterior/posterior pattern formation    | 14                                              | 2.13E-07 |          |                                                                                                                                                                                                                                               |                                                                                                                                                                                                                        |
|                                                | GO:0003002 Regionalization                         | 15                                              | 1.91E-06 |          |                                                                                                                                                                                                                                               |                                                                                                                                                                                                                        |
|                                                | GO:0048598 Embryonic morphogenesis                 | 18                                              | 4.67E-06 |          |                                                                                                                                                                                                                                               |                                                                                                                                                                                                                        |
|                                                | GO:0048705 Skeletal system morphogenesis           | 11                                              | 7.91E-06 |          |                                                                                                                                                                                                                                               |                                                                                                                                                                                                                        |
|                                                | GO:0048704 Embryonic skeletal system morphogenesis | 8                                               | 2.38E-05 |          |                                                                                                                                                                                                                                               |                                                                                                                                                                                                                        |
|                                                | GO:0048562 Embryonic organ morphogenesis           | 11                                              | 3.57E-05 |          |                                                                                                                                                                                                                                               |                                                                                                                                                                                                                        |
|                                                | GO:0048568 Embryonic organ development             | 12                                              | 6.55E-05 |          |                                                                                                                                                                                                                                               |                                                                                                                                                                                                                        |
|                                                | GO:0048706 Embryonic skeletal system development   | 8                                               | 1.67E-04 |          |                                                                                                                                                                                                                                               |                                                                                                                                                                                                                        |
|                                                | GO:0035113 Embryonic appendage morphogenesis       | 8                                               | 3.58E-04 |          |                                                                                                                                                                                                                                               |                                                                                                                                                                                                                        |
|                                                | GO:0030326 Embryonic limb morphogenesis            | 8                                               | 3.58E-04 |          |                                                                                                                                                                                                                                               |                                                                                                                                                                                                                        |
|                                                | GO:0043009 Chordate embryonic development          | 14                                              | 1.70E-03 |          |                                                                                                                                                                                                                                               |                                                                                                                                                                                                                        |
| Response to protein<br>(2.920)                 | GO:006986 Response to unfolded protein             | 8                                               | 9.99E-05 | 22       | AURKAP5, CALCR, COL3A1, DNAJA1, DNAJB1, DRD5, FABP4, HMOX1, HSPA1A, HSPA1B, HSPA6, HSPA7, HSPB1, HSPH1, IGF2BP2, LY6G6D, MAPK15, MGP, SELE, SERPINA1, SERPINH1, SRD5A2                                                                        |                                                                                                                                                                                                                        |
|                                                | GO:0051789 Response to protein stimulus            | 8                                               | 1.24E-03 |          |                                                                                                                                                                                                                                               |                                                                                                                                                                                                                        |
|                                                | GO:0010033 Response to organic substance           | 20                                              | 1.41E-02 |          |                                                                                                                                                                                                                                               |                                                                                                                                                                                                                        |
| FRONTAL CORTEX                                 | Inflammatory response<br>(3.487)                   | GO:006954 Inflammatory response                 | 12       | 6.66E-05 | 16                                                                                                                                                                                                                                            | APOA2, CARD18, CCL17, CCL26, CD44, CRP, F2, GP9, HRH4, IFNA2, IFNA6, MMRN1, PLA2G2A, S100A12, SELP, SERPINA3                                                                                                           |
|                                                |                                                    | GO:0009611 Response to wounding                 | 14       | 3.62E-04 |                                                                                                                                                                                                                                               |                                                                                                                                                                                                                        |
|                                                |                                                    | GO:0006952 Defense response                     | 14       | 1.44E-03 |                                                                                                                                                                                                                                               |                                                                                                                                                                                                                        |
|                                                | Response to protein<br>(1.897)                     | GO:006986 Response to unfolded protein          | 7        | 2.65E-03 | 7                                                                                                                                                                                                                                             | DNAJB1, HSPA1A, HSPA1B, HSPA6, HSPA7, HSPB1, SERPINH1                                                                                                                                                                  |
|                                                |                                                    | GO:0051789 Response to protein stimulus         | 7        | 1.13E-02 |                                                                                                                                                                                                                                               |                                                                                                                                                                                                                        |
| Cell death<br>(0.876)                          | GO:0042981 Regulation of apoptosis                 | 14                                              | 3.01E-02 | 14       | AGTR2, BAG3, CARD18, CASP14, CD44, CD70, F2, HSPA1A, HSPA1B, HSPB1, IFNA2, TBX5, TEX11, SFN                                                                                                                                                   |                                                                                                                                                                                                                        |
| GO:0043067 Regulation of programmed cell death | 14                                                 | 3.21E-02                                        |          |          |                                                                                                                                                                                                                                               |                                                                                                                                                                                                                        |
| GO:0010941 Regulation of cell death            | 14                                                 | 3.29E-02                                        |          |          |                                                                                                                                                                                                                                               |                                                                                                                                                                                                                        |

**Supplementary Table 3** *Notable biological processes involving sALS differentially expressed genes*

|                                          | Cluster ID<br>(Enrichment score)                             | GO term ID                                    | Count    | P value  | Total genes<br>in cluster | Genes                                                                                                  |
|------------------------------------------|--------------------------------------------------------------|-----------------------------------------------|----------|----------|---------------------------|--------------------------------------------------------------------------------------------------------|
| CEREBELLUM                               | Inflammatory response<br>(2.862)                             | GO:0006952 Defense response                   | 13       | 3.62E-05 | 14                        | <i>CARD18, CCR5, CR1, CXCL11, FCGR1C, FCN2, IL1RL2, IL9, LPA, LTF, LY6G6D, PLA2G2A, PLA2G2D, TRAT1</i> |
|                                          |                                                              | GO:0006954 Inflammatory response              | 7        | 4.97E-03 |                           |                                                                                                        |
|                                          |                                                              | GO:0009611 Response to wounding               | 8        | 1.44E-02 |                           |                                                                                                        |
|                                          | Morphogenesis<br>(1.234)                                     | GO:0048562 Embryonic organ morphogenesis      | 5        | 4.02E-03 | 5                         | <i>FOXE1, FOXG1, HOXA4, PTPRQ, WNT1</i>                                                                |
|                                          |                                                              | GO:0048568 Embryonic organ development        | 5        | 9.86E-03 |                           |                                                                                                        |
|                                          |                                                              | GO:0042472 Inner ear morphogenesis            | 3        | 3.05E-02 |                           |                                                                                                        |
|                                          |                                                              | GO:0042471 Ear morphogenesis                  | 3        | 4.12E-02 |                           |                                                                                                        |
|                                          | Ion homeostasis<br>(1.168)                                   | GO:0050801 Ion homeostasis                    | 7        | 1.45E-02 | 7                         | <i>ADIPOQ, CCR5, CHRNA1, LTF, MT1H, NPPB, SCARA5</i>                                                   |
|                                          |                                                              | GO:0006873 Cellular ion homeostasis           | 6        | 3.56E-02 |                           |                                                                                                        |
| GO:0055082 Cellular chemical homeostasis |                                                              | 6                                             | 3.77E-02 |          |                           |                                                                                                        |
| GO:0048878 Chemical homeostasis          |                                                              | 7                                             | 3.83E-02 |          |                           |                                                                                                        |
| FRONTAL CORTEX                           | Hematopoiesis and<br>immune system<br>development<br>(1.924) | GO:0020027 Hemoglobin metabolic process       | 3        | 8.79E-04 | 5                         | <i>AHSP, ALAS2, EPB42, IL4, PAX1</i>                                                                   |
|                                          |                                                              | GO:0030097 Hemopoiesis                        | 5        | 2.17E-02 |                           |                                                                                                        |
|                                          |                                                              | GO:0048534 Hemopoietic or lymphoid organ de   | 5        | 2.96E-02 |                           |                                                                                                        |
|                                          |                                                              | GO:0002520 Immune system development          | 5        | 3.57E-02 |                           |                                                                                                        |
|                                          | G-protein signaling<br>(0.997)                               | GO:0007186 G-protein coupled receptor protein | 11       | 2.76E-02 | 11                        | <i>BRS3, CXCL10, CXCL11, GABRR2, HRH4, OR10H5, OR13C5, OR2M4, OR52N2, RXFP2, TAAR3</i>                 |
|                                          | Defense response<br>(0.870)                                  | GO:0006952 Defense response                   | 8        | 2.02E-02 | 8                         | <i>CXCL10, CXCL11, HRH4, IFNA8, IL4, PLA2G2A, PSG7, SLAMF7</i>                                         |
|                                          | Ion homeostasis<br>(0.841)                                   | GO:0050801 Ion homeostasis                    | 6        | 3.68E-02 | 6                         | <i>ALAS2, CHRNG, EPB42, OXT, RHAG, SLC4A1</i>                                                          |

**Supplementary Table 4** *Notable gene ontology (GO) terms based on analysis of down- or up-regulated genes in c9ALS*

| GO Category        | Downregulated       |                             |                                                      | Upregulated |                                                 |                                 |          |
|--------------------|---------------------|-----------------------------|------------------------------------------------------|-------------|-------------------------------------------------|---------------------------------|----------|
|                    | GO Term             |                             | P Value                                              | GO Term     |                                                 | P Value                         |          |
| Cerebellum         | Biological function | GO:0007186                  | G-protein coupled receptor protein signaling pathway | 3.04E-02    | GO:0007389                                      | Pattern specification process   | 8.46E-10 |
|                    |                     | GO:0050890                  | Cognition                                            | 3.52E-02    | GO:0001501                                      | Skeletal system development     | 2.70E-09 |
|                    |                     | GO:0030808                  | Regulation of nucleotide biosynthetic process        | 3.63E-02    | GO:0048598                                      | Embryonic morphogenesis         | 2.70E-07 |
|                    |                     | GO:0006955                  | Immune response                                      | 3.84E-02    | GO:0006986                                      | Response to unfolded protein    | 2.74E-05 |
|                    |                     | GO:0006140                  | Regulation of nucleotide metabolic process           | 3.99E-02    | GO:0006954                                      | Inflammatory response           | 5.41E-05 |
|                    | Cellular component  | GO:0016021                  | Integral to membrane                                 | 2.04E-02    | GO:0005576                                      | Extracellular region            | 1.01E-08 |
|                    |                     | GO:0031224                  | Intrinsic to membrane                                | 3.14E-02    | GO:0032993                                      | Protein-DNA complex             | 5.32E-04 |
|                    |                     | GO:0000267                  | Cell fraction                                        | 3.34E-02    | GO:0000786                                      | Nucleosome                      | 8.72E-04 |
|                    |                     |                             |                                                      |             | GO:0044449                                      | Contractile fiber part          | 1.09E-02 |
|                    | Molecular function  |                             | N/A                                                  | N/A         | GO:0031093                                      | Platelet alpha granule lumen    | 1.24E-02 |
|                    |                     |                             |                                                      | GO:0043565  | Sequence-specific DNA binding                   | 1.47E-08                        |          |
|                    |                     |                             |                                                      | GO:0003700  | Transcription factor activity                   | 1.73E-05                        |          |
|                    |                     |                             |                                                      | GO:0003702  | RNA polymerase II transcription factor activity | 1.37E-02                        |          |
|                    |                     |                             |                                                      | GO:0030414  | Peptidase inhibitor activity                    | 1.42E-02                        |          |
| Frontal cortex     | Biological function | GO:0015669                  | Gas transport                                        | 3.78E-08    | GO:0019865                                      | Immunoglobulin binding          | 1.55E-02 |
|                    |                     | GO:0015671                  | Oxygen transport                                     | 2.00E-06    | GO:0006954                                      | Inflammatory response           | 3.98E-06 |
|                    |                     | GO:0020027                  | Hemoglobin metabolic process                         | 1.98E-02    | GO:0009611                                      | Response to wounding            | 1.65E-05 |
|                    |                     |                             |                                                      |             | GO:0006952                                      | Defense response                | 7.73E-05 |
|                    |                     |                             |                                                      |             | GO:0006986                                      | Response to unfolded protein    | 8.95E-04 |
|                    | Cellular component  |                             |                                                      |             | GO:0007586                                      | Digestion                       | 2.25E-03 |
|                    |                     | GO:0005833                  | Hemoglobin complex                                   | 4.68E-09    | GO:0005615                                      | Extracellular space             | 1.35E-07 |
|                    |                     | GO:0044445                  | Cytosolic part                                       | 1.70E-04    | GO:0030485                                      | Smooth muscle contractile fiber | 2.45E-02 |
|                    |                     | GO:0005829                  | Cytosol                                              | 3.27E-02    | GO:0030141                                      | Secretory granule               | 2.52E-02 |
|                    |                     |                             |                                                      |             | GO:0043292                                      | Contractile fiber               | 3.89E-02 |
| Molecular function |                     |                             |                                                      | GO:0031091  | Platelet alpha granule                          | 4.69E-02                        |          |
|                    | GO:0005344          | Oxygen transporter activity | 2.01E-06                                             | GO:0004857  | Enzyme inhibitor activity                       | 2.51E-03                        |          |
|                    | GO:0019825          | Oxygen binding              | 8.34E-05                                             | GO:0005179  | Hormone activity                                | 6.43E-03                        |          |
|                    | GO:0020037          | Heme binding                | 1.76E-03                                             | GO:0005125  | Cytokine activity                               | 1.09E-02                        |          |
|                    | GO:0030492          | Hemoglobin binding          | 6.00E-03                                             | GO:0030414  | Peptidase inhibitor activity                    | 2.09E-02                        |          |
|                    | GO:0030506          | Ankyrin binding             | 1.39E-02                                             | GO:0005518  | Collagen binding                                | 2.52E-02                        |          |

**Supplementary Table 5** *Notable gene ontology (GO) terms based on analysis of down- or up-regulated genes in sALS*

|                                          | Downregulated                   |                                                       |                                        | Upregulated                                       |          |
|------------------------------------------|---------------------------------|-------------------------------------------------------|----------------------------------------|---------------------------------------------------|----------|
|                                          | GO Category                     | GO Term                                               | P Value                                | GO Term                                           | P Value  |
| Cerebellum                               | Biological function             | GO:0048568 Embryonic organ development                | 5.24E-03                               | GO:0006952 Defense response                       | 3.10E-05 |
|                                          |                                 | GO:0051252 Regulation of RNA metabolic process        | 8.62E-03                               | GO:0006955 Immune response                        | 2.35E-03 |
|                                          |                                 | GO:0043583 Ear development                            | 1.64E-02                               | GO:0006954 Inflammatory response                  | 1.16E-02 |
|                                          |                                 | GO:0006355 Regulation of transcription, DNA-dependent | 2.37E-02                               | GO:0007210 Serotonin receptor signaling pathway   | 1.36E-02 |
|                                          |                                 | GO:0048598 Embryonic morphogenesis                    | 2.49E-02                               | GO:0009611 Response to wounding                   | 1.40E-02 |
|                                          | Cellular component              | GO:0044421 Extracellular region part                  | 4.76E-03                               | GO:0005576 Extracellular region                   | 4.76E-02 |
|                                          |                                 | GO:0005615 Extracellular space                        | 1.77E-02                               |                                                   |          |
|                                          |                                 | GO:0005576 Extracellular region                       | 2.94E-02                               |                                                   |          |
|                                          | Molecular function              | GO:0046870 Cadmium ion binding                        | 2.44E-02                               | GO:0004620 Phospholipase activity                 | 2.82E-02 |
| GO:0005179 Hormone activity              |                                 | 2.89E-02                                              | GO:0016298 Lipase activity             | 3.96E-02                                          |          |
| GO:0003700 Transcription factor activity |                                 | 2.97E-02                                              | GO:0004993 Serotonin receptor activity | 4.03E-02                                          |          |
| Frontal cortex                           | Biological function             | GO:0015669 Gas transport                              | 1.05E-05                               | GO:0007600 Sensory perception                     | 2.04E-02 |
|                                          |                                 | GO:0020027 Hemoglobin metabolic process               | 2.57E-04                               |                                                   |          |
|                                          |                                 | GO:0015671 Oxygen transport                           | 4.43E-04                               |                                                   |          |
|                                          |                                 | GO:0030097 Hemopoiesis                                | 2.48E-03                               |                                                   |          |
|                                          | Cellular component              | GO:0050801 Ion homeostasis                            | 2.91E-03                               | GO:0007186 G-protein coupled receptor protein sig | 2.10E-02 |
|                                          |                                 | GO:0005833 Hemoglobin complex                         | 1.62E-06                               |                                                   |          |
|                                          |                                 | GO:0044445 Cytosolic part                             | 3.51E-03                               |                                                   |          |
|                                          |                                 | GO:0005615 Extracellular space                        | 1.12E-02                               |                                                   |          |
|                                          |                                 | GO:0005576 Extracellular region                       | 4.10E-02                               |                                                   |          |
|                                          | Molecular function              | GO:0044421 Extracellular region part                  | 4.15E-02                               | GO:0050890 Cognition                              | 3.18E-02 |
|                                          |                                 | GO:0005344 Oxygen transporter activity                | 4.23E-04                               |                                                   |          |
|                                          |                                 | GO:0019825 Oxygen binding                             | 4.69E-03                               |                                                   |          |
| Molecular function                       | GO:0030506 Ankyrin binding      | 1.66E-02                                              | N/A                                    | N/A                                               |          |
|                                          | GO:0020037 Heme binding         | 3.36E-02                                              |                                        |                                                   |          |
|                                          | GO:0046906 Tetrapyrrole binding | 3.78E-02                                              |                                        |                                                   |          |
|                                          |                                 |                                                       |                                        |                                                   |          |

**Supplementary Table 6** *Weighted gene co-expression correlation network analyses (WGCNA) reveal significantly altered gene modules in cerebellum and frontal cortex of sALS*

| <b>Cerebellum</b>     |                |                   |                                                       |                           |
|-----------------------|----------------|-------------------|-------------------------------------------------------|---------------------------|
| <b>Module name</b>    | <b>P value</b> | <b>Gene count</b> | <b>Notable GO terms</b>                               | <b>Enrichment P value</b> |
| MEtan                 | 0.0161         | 80                | Ca <sup>2+</sup> ion transport, synaptic transmission | 2.30E-05                  |
| MElightgreen          | 0.0191         | 59                | Pyrimidine biosynthesis                               | 2.90E-02                  |
| MEred                 | 0.0279         | 162               | Nerve impulse, synaptic transmission, cytoskeleton    | 6.70E-06                  |
| <b>Frontal cortex</b> |                |                   |                                                       |                           |
| <b>Module name</b>    | <b>P value</b> | <b>Gene count</b> | <b>Notable GO terms</b>                               | <b>Enrichment P value</b> |
| MEpurple              | 0.0010         | 65                | Oxidative phosphorylation                             | 1.60E-04                  |
| MEskyblue             | 0.0025         | 34                | Transcription                                         | 1.70E-03                  |
| MEbrown               | 0.0026         | 118               | Electron transport chain                              | 1.10E-07                  |
| MEsteelblue           | 0.0051         | 31                | RNA elongation                                        | 3.30E-05                  |
| MElightyellow         | 0.0170         | 41                | Translation elongation/Ribosomes                      | 6.00E-56                  |
| MEdarkorange          | 0.0268         | 35                | Protein localization                                  | 1.40E-02                  |
| MEdarkgrey            | 0.0273         | 37                | Cell motion                                           | 1.10E-03                  |
| MElightcyan           | 0.0373         | 50                | Oxidative phosphorylation                             | 2.30E-12                  |
| MEdarkolivegreen      | 0.0389         | 27                | Protein localization                                  | 5.00E-04                  |
| MEsaddlebrown         | 0.0405         | 33                | Response to protein stimulus                          | 1.50E-02                  |
| MEyellow              | 0.0414         | 87                | Intracellular transport                               | 3.10E-04                  |
| MEpink                | 0.0419         | 73                | Cellular macromolecule catabolic process              | 3.90E-03                  |

WGCNA co-expression analyses were performed with data from sALS cerebellum and frontal cortex (*versus* controls,  $P < 0.05$ ). All significant modules are shown. The most notable gene ontology (GO) terms and their enrichment  $P$  value are included for each module.

Supplementary Table 7 Top biological processes from gene ontology analyses of AS genes in c9ALS

| Cluster ID<br>(Enrichment score) | GO term ID                                                               | Count | P value  | Total genes<br>in cluster | Genes                                                                                                                                                                                                                                                                                                                                                                                                                                                                                                                                                                                                                                                                                                                                                                                                                                                                                                                                                                                                                                                                                                                                                                                                                                                                                                                                                                              |
|----------------------------------|--------------------------------------------------------------------------|-------|----------|---------------------------|------------------------------------------------------------------------------------------------------------------------------------------------------------------------------------------------------------------------------------------------------------------------------------------------------------------------------------------------------------------------------------------------------------------------------------------------------------------------------------------------------------------------------------------------------------------------------------------------------------------------------------------------------------------------------------------------------------------------------------------------------------------------------------------------------------------------------------------------------------------------------------------------------------------------------------------------------------------------------------------------------------------------------------------------------------------------------------------------------------------------------------------------------------------------------------------------------------------------------------------------------------------------------------------------------------------------------------------------------------------------------------|
| Proteolysis<br>(4.786)           | GO:0044265 Cellular macromolecule catabolic process                      | 154   | 2.01E-08 | 208                       | AUH, BAX, BRCA1, BRCC3, BUB3, C12ORF51, C2, C9ORF3, CAPN10, CAPN3, CAPN7, CASP12, CBLB, CCNB1IP1, CCNH, CD46, CDC23, CDK7, CFLAR, CHFR, CLN3, CLN6, CLU, CRBN, CTSB, CUL2, CUL4A, DCAF15, DDB2, DDIT2, DET1, DFFB, DLD, DNASE1, DNASE1L1, DPF7, DPP8, DPP9, DZIP3, E4F1, EDEM3, EIF3E, EML2, ERCC1, ERCC2, ERLEC1, ERLIN1, ERLIN2, F3, FANCL, FBXL20, FBXL3, FBXL6, FBXO25, FBXO28, FBXO29, FBXO7, FBXW11, FBXW5, FBXW7, FKBP1A, FOLH1, G2E3, GTF2H3, GUSB, HDAC6, HECTD2, HECTD3, HECW1, HERC3, KDM2B, KLHL20, LDLR, LGMN, LRP8, LRSAM1, MAD2L1, MAGOH, MAN2B1, MARCH6, MARCH7, MARCH8, METAP1, MGEA5, MLH1, MUTYH, MYCBP2, MYSM1, NAALAD2, NGLY1, NPEPL1, OGG1, OS9, P2RX7, PABPC4, PAN2, PAN3, PARN, PCNP, PCSK4, PI3K, PMPCA, PPP2R5C, PREPL, PRSS22, PRSS27, PSMB10, PSMC1, PSDM13, PSDM5, QPCTL, RAB40B, RABGEF1, RBCK1, RCE1, RELA, RFW2D, RNASET2, RNF111, RNF123, RNF138, RNF144B, RNF167, RNF19B, RNF7, RNF8, RNFH1, RNPS1, RPS6KA5, SCPEP1, SENP2, SENP5, SENP6, SENP7, SERPING1, SMG7, SMUG1, SOCS7, SPOF, TBL1X, TCEB1, UDF, THOP1, TRIM33, TRIM5, TRIP12, UBA2, UBA3, UBA5, UBE2B, UBE2D4, UBE2H, UBE2J, UBE2Q, UBE2Z, UBE3A, UBE3C, UBE4B, UBL1, UFM1, TGF, UFP3A, UFP3B, USP12, USP14, USP15, USP24, USP25, USP28, USP3, USP30, USP33, USP37, USP4, USP42, USP47, USP5, USP53, USP54, USP8, WDR48, WDR7, WSB1, XIAP, XPA, XPNPEP1, XRCC6BP1, XRN2, YME1L1, ZCCHC11 |
|                                  | GO:0033554 Cellular response to stress                                   | 117   | 4.93E-06 |                           |                                                                                                                                                                                                                                                                                                                                                                                                                                                                                                                                                                                                                                                                                                                                                                                                                                                                                                                                                                                                                                                                                                                                                                                                                                                                                                                                                                                    |
|                                  | GO:0006974 Response to DNA damage stimulus                               | 82    | 1.58E-05 |                           |                                                                                                                                                                                                                                                                                                                                                                                                                                                                                                                                                                                                                                                                                                                                                                                                                                                                                                                                                                                                                                                                                                                                                                                                                                                                                                                                                                                    |
|                                  | GO:0006281 DNA repair                                                    | 65    | 3.75E-05 |                           |                                                                                                                                                                                                                                                                                                                                                                                                                                                                                                                                                                                                                                                                                                                                                                                                                                                                                                                                                                                                                                                                                                                                                                                                                                                                                                                                                                                    |
|                                  | GO:0006259 DNA metabolic process                                         | 99    | 2.47E-04 |                           |                                                                                                                                                                                                                                                                                                                                                                                                                                                                                                                                                                                                                                                                                                                                                                                                                                                                                                                                                                                                                                                                                                                                                                                                                                                                                                                                                                                    |
|                                  | GO:0045184 Establishment of protein localization                         | 158   | 1.25E-07 |                           |                                                                                                                                                                                                                                                                                                                                                                                                                                                                                                                                                                                                                                                                                                                                                                                                                                                                                                                                                                                                                                                                                                                                                                                                                                                                                                                                                                                    |
|                                  | GO:0015031 Protein transport                                             | 155   | 3.26E-07 |                           |                                                                                                                                                                                                                                                                                                                                                                                                                                                                                                                                                                                                                                                                                                                                                                                                                                                                                                                                                                                                                                                                                                                                                                                                                                                                                                                                                                                    |
| Protein transport<br>(4.303)     | GO:0008104 Protein localization                                          | 174   | 4.17E-07 | 210                       | AAAS, ACTN4, AFTPH, AGAP1, AGAP3, AGF21, AKAP10, ANK3, APIG2, AP1S2, AP2B1, AP2M1, AP3B2, AP3S1, AP4M1, AP4S1, APBA2, ARFGAP1, ARFIP1, ARHGAP33, ATG16L1, ATG4A, ATG4D, ATG7, ATG9A, ATP7B, BAK1, BAX, BBS4, BCL3, BID, BLZF1, CADPS, CADPS2, CAMK1, CBLB, CHCHD4, CHMP7, CLINT1, CLTA, CLTB, CLTCL1, COG3, COG6, COPA, COPE, COPZ2, CPT1B, CSPG5, DDX19A, DDX19B, DMD, DSCR3, DST, DVL1, EIF4ENIF1, ERC1, ERGIC2, EXOC3, EXOC6, EXOC6B, EXOC7, FAM125B, FGFR10P, FLNA, G3BP2, GGA1, GGA3, GIPC1, GNPTG, GOLT1B, GRIN2C, GRPEL2, GTF2A1L, HDAC6, HINFP, HOOK2, HPS4, KATNA1, KIF18, KLC1, LMAN2L, LMF1, LRSAM1, MAMDC4, MCM3AP, MGEA5, MIA3, MITD1, MLH3, MLX, MON2, MTX1, MUTED, MVP, MYH10, MYH14, MYO6, NAPG, NDE1, NECAP1, NECAP2, NPEPL1, NUP153, NUP188, NUP54, NUP62, NUP88, NUP98, NUPL1, NUPL2, NXF1, OPA1, OS9, PAX6, PEX1, PEX10, PEX19, PEX28, MUSH1, STRADA, STRADB, STX18, STX1A, STX3, STXBPA1, STXBPA2, SYNRG, SYTL2, TERF2, THOC1, THOC2, TIMM44, TNPO3, TOMM40L, TPM1, TRAK2, TRAPPC2, TRAPPC2L, TRPC4AP, UNC50, UPF1, VPS13D, VPS26A, VPS29, VPS33B, VPS37A, VPS4B, VPS53, VTA1, VTI1A, VTI1B, XPO1, XPO4, YWHAH, ZDHHC17, ZMAT3, ZNF384                                                                                                                                                                                                                        |
|                                  | GO:0034613 Cellular protein localization                                 | 83    | 2.96E-04 |                           |                                                                                                                                                                                                                                                                                                                                                                                                                                                                                                                                                                                                                                                                                                                                                                                                                                                                                                                                                                                                                                                                                                                                                                                                                                                                                                                                                                                    |
|                                  | GO:0070727 Cellular macromolecule localization                           | 83    | 3.76E-04 |                           |                                                                                                                                                                                                                                                                                                                                                                                                                                                                                                                                                                                                                                                                                                                                                                                                                                                                                                                                                                                                                                                                                                                                                                                                                                                                                                                                                                                    |
|                                  | GO:0006886 Intracellular protein transport                               | 74    | 1.17E-03 |                           |                                                                                                                                                                                                                                                                                                                                                                                                                                                                                                                                                                                                                                                                                                                                                                                                                                                                                                                                                                                                                                                                                                                                                                                                                                                                                                                                                                                    |
|                                  | GO:0006468 Protein amino acid phosphorylation                            | 131   | 1.83E-05 |                           |                                                                                                                                                                                                                                                                                                                                                                                                                                                                                                                                                                                                                                                                                                                                                                                                                                                                                                                                                                                                                                                                                                                                                                                                                                                                                                                                                                                    |
|                                  | GO:0006793 Phosphorus metabolic process                                  | 177   | 5.93E-05 |                           |                                                                                                                                                                                                                                                                                                                                                                                                                                                                                                                                                                                                                                                                                                                                                                                                                                                                                                                                                                                                                                                                                                                                                                                                                                                                                                                                                                                    |
| Phosphorylation<br>(4.123)       | GO:0006796 Phosphate metabolic process                                   | 177   | 5.93E-05 | 177                       | AATK, ABI1, ABI2, ABL2, ACP1, ACVR1, ACVR1B, ADAM10, AKT2, ATP6V1E1, AURKA, AURKC, BRSK2, CAMK1, CAMK1G, CAMK2B, CAMK2D, CAMK2G, CAMKK1, CAMKK2, CASK, CDK10, CDK11B, CDK16, CDK20, CDK7, CDK8, CIT, CLK4, COL4A3BP, CSNK1A1, CSNK1G3, DAPK1, DDR1, DGUOK, DLD, DUSP11, DYRK4, EEF2K, EFNA1, EIF2AK4, EPM2A, ERC1, FES, FGR, FLT3, FRS2, FUK, FYN, GAB1, GAK, GMEF, GPD2, GRK4, GRK6, HUS1, IKBKKB, ILK, ILKAP, INPP1, IP6K2, IRAK1, KALRN, KSR1, LIPE, LRRK2, MADD, MAP2, MAP2K2, MAP2K3, MAP2K4, MAP2K7, MAP3K12, MAP3K6, MAP3K7, MAP3K9, MAP4K4, MAPK10, MAPK11, MAPK12, MAPK7, MAPK9, MARK1, MARK2, MARK3, MARK4, MAST1, MASTL, MINK1, MNK1, MNK2, MON2, MST4, MTM1, MTMR1, MTMR11, MTMR14, MTMR2, MTMR3, NDUFB10, NDUFS2, NEK11, NEK6, NEK9, NPR2, NRBP2, NTRK2, NTRK3, P2RX7, PAK6, PAN3, PDK1, PDP1, PHKG1, PHKG2, PI4KB, PICK1, PIK3CB, PIP5K1A, PIP5K1B, PML, PPA2, PPA2A, PPM1A, PPP5C, PPP6C, PRKACB, PRKDC, PTK2, PTP4A3, PTPN12, PTPN13, PTPN23, PTPN4, PTPRD, PTPRE, PTPRF, PTPRK, PTPRM, PTPRN2, PTPRO, PXK, RIPK1, RPS6KA5, RPS6KB1, RPS6KB2, RPS6KL1, SBF1, SBF2, SCYL2, SMAD2, SNRK, SSH3, STK38L, STK40, STRADA, STRADB, SYNJ1, TAOK3, TAZ, TBCK, TEK, TEX14, TGFBR1, TNIK, TNK2, TRIO, TRPM7, TWF1, UGP2, ULK2, ULK3, UOCHR, VRK3, WNK1, WNK3                                                                                                                  |
|                                  | GO:0015931 Nucleobase, nucleoside, nucleotide and nucleic acid transport | 33    | 3.91E-05 |                           |                                                                                                                                                                                                                                                                                                                                                                                                                                                                                                                                                                                                                                                                                                                                                                                                                                                                                                                                                                                                                                                                                                                                                                                                                                                                                                                                                                                    |
|                                  | GO:0051028 mRNA transport                                                | 27    | 7.56E-05 |                           |                                                                                                                                                                                                                                                                                                                                                                                                                                                                                                                                                                                                                                                                                                                                                                                                                                                                                                                                                                                                                                                                                                                                                                                                                                                                                                                                                                                    |
|                                  | GO:0051236 Establishment of RNA localization                             | 29    | 8.05E-05 |                           |                                                                                                                                                                                                                                                                                                                                                                                                                                                                                                                                                                                                                                                                                                                                                                                                                                                                                                                                                                                                                                                                                                                                                                                                                                                                                                                                                                                    |
| RNA transport<br>(4.109)         | GO:0050657 Nucleic acid transport                                        | 29    | 8.05E-05 | 33                        | AGFG1, ATXN2, CKAP5, DDX19A, DDX19B, ENY2, G3BP2, HNRNPA1L2, MAGOH, MVP, NUP153, NUP188, NUP54, NUP62, NUP88, NUP98, NUPL1, NUPL2, NXF1, POM121, RAE1, SENP2, SLC23A2, SLC25A19, SLC29A1, SLC29A2, SMG7, THOC1, THOC2, UPF1, UPP3A, UPP3B, XPO1                                                                                                                                                                                                                                                                                                                                                                                                                                                                                                                                                                                                                                                                                                                                                                                                                                                                                                                                                                                                                                                                                                                                    |
|                                  | GO:0050658 RNA transport                                                 | 29    | 8.05E-05 |                           |                                                                                                                                                                                                                                                                                                                                                                                                                                                                                                                                                                                                                                                                                                                                                                                                                                                                                                                                                                                                                                                                                                                                                                                                                                                                                                                                                                                    |
|                                  | GO:0006403 RNA localization                                              | 29    | 1.44E-04 |                           |                                                                                                                                                                                                                                                                                                                                                                                                                                                                                                                                                                                                                                                                                                                                                                                                                                                                                                                                                                                                                                                                                                                                                                                                                                                                                                                                                                                    |
|                                  | GO:0070647 Protein modification by small protein conjugation or removal  | 44    | 8.68E-06 |                           |                                                                                                                                                                                                                                                                                                                                                                                                                                                                                                                                                                                                                                                                                                                                                                                                                                                                                                                                                                                                                                                                                                                                                                                                                                                                                                                                                                                    |
| Protein modification<br>(3.780)  | GO:0000209 Protein polyubiquitination                                    | 12    | 3.52E-04 | 44                        | ATXN7, BRCA1, BRCC3, CHFR, CTR9, DDB2, DZIP3, ENY2, ERCC8, FBXL3, FBXO25, FBXW11, FBXW7, G2E3, HDAC6, KAT2A, LMO7, LRSAM1, MYSM1, NOSIP, OS9, PCNP, PPI2L, RNF144B, RNF167, RNF7, RNF8, SENP2, SENP7, SOCS7, TRIM23, TRIM33, TRIP12, TRRAP, UBA3, UBE2B, UBE2H, UBE3A, UBE3C, UBE4B, USP12, USP33, WDR48, WDSUB1                                                                                                                                                                                                                                                                                                                                                                                                                                                                                                                                                                                                                                                                                                                                                                                                                                                                                                                                                                                                                                                                   |
|                                  | GO:0032446 Protein modification by small protein conjugation             | 34    | 4.02E-04 |                           |                                                                                                                                                                                                                                                                                                                                                                                                                                                                                                                                                                                                                                                                                                                                                                                                                                                                                                                                                                                                                                                                                                                                                                                                                                                                                                                                                                                    |
|                                  | GO:0016567 Protein ubiquitination                                        | 31    | 6.21E-04 |                           |                                                                                                                                                                                                                                                                                                                                                                                                                                                                                                                                                                                                                                                                                                                                                                                                                                                                                                                                                                                                                                                                                                                                                                                                                                                                                                                                                                                    |
| Endocytosis<br>(3.561)           | GO:0016192 Vesicle-mediated transport                                    | 124   | 2.72E-07 | 139                       | ABCA7, AGAP3, AMPH, ANK1, AP1G2, AP1S2, AP2B1, AP2M1, AP3B2, AP3S1, AP4M1, AP4S1, ARFGAP1, ARRB2, ASGR1, ATG7, BAK1, BAX, BID, BLZF1, CACNA1A, CACNA1C, CADPS, CADPS2, CAP1, CCDC88A, CHMP7, CLINT1, CLN3, CLTA, CLTB, CLTCL1, CNH, COG3, COPA, COPE, COPZ2, CPNE1, CPNE6, CRCP, DAB2, DENND1A, DNMI1, DNMI1L, DOCK2, DYSF, ELMO2, ELMO3, EPN2, EPS15L1, ERC1, ERGIC2, EXOC3, EXOC6, EXOC6B, EXOC7, FLNA, GGA1, GGA3, GNPAT, GOLGA4, GOLT1B, GRK4, GSN, GTF2A1L, HOOK2, ITSN1, ITSN2, KALRN, LAT, LDLR, LDLRAP1, LMAN2L, LRP12, LRP8, LRSAM1, MIA3, MON2, MUTED, MYH10, MYO6, NAPG, NECAP1, NECAP2, NPEPL1, NRAS, NRCAN, OPA1, P2RX7, PCSKA, PI4KB, PICAML, PICK1, PLDN, PLSCR1, PLSCR4, PUM1, RAB1A, RAB34, RAB35, RAB39B, RABEPK, RABGEF1, RPH3AL, RPTN1, SAR1A, SAR1B, SCARB1, SCFD1, SEC16A, SEC23A, SEC31A, SEC31B, SH3GLB1, SLC11A1, SNAF91, SNAFIN, SNX4, SPAST, STON1, STX18, STX1A, STX3, STXBPA1, SYNJ1, SYNRG, SYTL2, TAZ, TRAPPC2, TRAPPC2L, TRAPPC6A, UNC13D, VAV3, VPS26A, VPS33B, VPS4B, VTI1A, VTI1B                                                                                                                                                                                                                                                                                                                                                               |
|                                  | GO:0016044 Membrane organization                                         | 77    | 4.87E-04 |                           |                                                                                                                                                                                                                                                                                                                                                                                                                                                                                                                                                                                                                                                                                                                                                                                                                                                                                                                                                                                                                                                                                                                                                                                                                                                                                                                                                                                    |
|                                  | GO:0006897 Endocytosis                                                   | 45    | 6.57E-03 |                           |                                                                                                                                                                                                                                                                                                                                                                                                                                                                                                                                                                                                                                                                                                                                                                                                                                                                                                                                                                                                                                                                                                                                                                                                                                                                                                                                                                                    |
|                                  | GO:0010324 Membrane invagination                                         | 45    | 6.57E-03 |                           |                                                                                                                                                                                                                                                                                                                                                                                                                                                                                                                                                                                                                                                                                                                                                                                                                                                                                                                                                                                                                                                                                                                                                                                                                                                                                                                                                                                    |

CEREBELLUM

**Supplementary Table 7 (continued)** *Top biological processes from gene ontology analyses of AS genes in c9ALS*

| FRONTAL CORTEX                    | Cluster ID                      | GO term ID                                                                           | Count    | P value  | Total genes                                                                                                                                 | Genes                                                                                                                                                                                                                                                                                                                                                                                                                                                                                                                                                                                                                                                                                                                                                                                                                                                                                                                                                                                                                                                                                                                                                                                                                                                                                                                                                                                                                                                                                                                                                                                                                                                                                                                                                                                                                                                                                                                                                                                                                                                                                                                                                                                                                                                                                                                                                                                                                                                                                                                                                                                                                                                                                                                                                                                                                                                                                                                                                                                                                                                                                                                                                                                                                                                                                                                                                                                                                                                                                                                                                                                                                                                                                                                                                                                                                                                                                                                                                                                                                                                                                                                                                                                                                                                                                                                                                                                                                                                                                                                                                                                                                                                                                                                                                                                                                                                                                                                                                                                                                                                                                                                                                                                                                                                                                                                                                                                                                                                                                                                                                                                                                                                                                                                                                                                                                                                                                                                                                                                                                                                                                                                                                                                                                                                                                                                                                                                                                                                                                                                                                                                                                                                                                                                                                                                                                                                                                                                                                                                                                                                                                                                                                                                                                                                                                                                                                                                                                                                                                                                                                                                                                                                                                                                                                                                                                                                                                                                                                                                                                                                                                                                                                                                                                                                                                                                                                                                                                                                                                                                                                                                                                                                                                                                                                                                                                                                                                                                                                                                                                                                                                                                                                                                                                                                                                                                                                                                                                                                                                                                                                                                                                                                                                                                                                                                                                                                                          |
|-----------------------------------|---------------------------------|--------------------------------------------------------------------------------------|----------|----------|---------------------------------------------------------------------------------------------------------------------------------------------|--------------------------------------------------------------------------------------------------------------------------------------------------------------------------------------------------------------------------------------------------------------------------------------------------------------------------------------------------------------------------------------------------------------------------------------------------------------------------------------------------------------------------------------------------------------------------------------------------------------------------------------------------------------------------------------------------------------------------------------------------------------------------------------------------------------------------------------------------------------------------------------------------------------------------------------------------------------------------------------------------------------------------------------------------------------------------------------------------------------------------------------------------------------------------------------------------------------------------------------------------------------------------------------------------------------------------------------------------------------------------------------------------------------------------------------------------------------------------------------------------------------------------------------------------------------------------------------------------------------------------------------------------------------------------------------------------------------------------------------------------------------------------------------------------------------------------------------------------------------------------------------------------------------------------------------------------------------------------------------------------------------------------------------------------------------------------------------------------------------------------------------------------------------------------------------------------------------------------------------------------------------------------------------------------------------------------------------------------------------------------------------------------------------------------------------------------------------------------------------------------------------------------------------------------------------------------------------------------------------------------------------------------------------------------------------------------------------------------------------------------------------------------------------------------------------------------------------------------------------------------------------------------------------------------------------------------------------------------------------------------------------------------------------------------------------------------------------------------------------------------------------------------------------------------------------------------------------------------------------------------------------------------------------------------------------------------------------------------------------------------------------------------------------------------------------------------------------------------------------------------------------------------------------------------------------------------------------------------------------------------------------------------------------------------------------------------------------------------------------------------------------------------------------------------------------------------------------------------------------------------------------------------------------------------------------------------------------------------------------------------------------------------------------------------------------------------------------------------------------------------------------------------------------------------------------------------------------------------------------------------------------------------------------------------------------------------------------------------------------------------------------------------------------------------------------------------------------------------------------------------------------------------------------------------------------------------------------------------------------------------------------------------------------------------------------------------------------------------------------------------------------------------------------------------------------------------------------------------------------------------------------------------------------------------------------------------------------------------------------------------------------------------------------------------------------------------------------------------------------------------------------------------------------------------------------------------------------------------------------------------------------------------------------------------------------------------------------------------------------------------------------------------------------------------------------------------------------------------------------------------------------------------------------------------------------------------------------------------------------------------------------------------------------------------------------------------------------------------------------------------------------------------------------------------------------------------------------------------------------------------------------------------------------------------------------------------------------------------------------------------------------------------------------------------------------------------------------------------------------------------------------------------------------------------------------------------------------------------------------------------------------------------------------------------------------------------------------------------------------------------------------------------------------------------------------------------------------------------------------------------------------------------------------------------------------------------------------------------------------------------------------------------------------------------------------------------------------------------------------------------------------------------------------------------------------------------------------------------------------------------------------------------------------------------------------------------------------------------------------------------------------------------------------------------------------------------------------------------------------------------------------------------------------------------------------------------------------------------------------------------------------------------------------------------------------------------------------------------------------------------------------------------------------------------------------------------------------------------------------------------------------------------------------------------------------------------------------------------------------------------------------------------------------------------------------------------------------------------------------------------------------------------------------------------------------------------------------------------------------------------------------------------------------------------------------------------------------------------------------------------------------------------------------------------------------------------------------------------------------------------------------------------------------------------------------------------------------------------------------------------------------------------------------------------------------------------------------------------------------------------------------------------------------------------------------------------------------------------------------------------------------------------------------------------------------------------------------------------------------------------------------------------------------------------------------------------------------------------------------------------------------------------------------------------------------------------------------------------------------------------------------------------------------------------------------------------------------------------------------------------------------------------------------------------------------------------------------------------------------------------------------------------------------------------------------------------------------------------------------------------------------------------------------------------------------------------------------------------------------------------------------------------------------------------------------------------------------------------------------------------------------------------------------------------------------------------------------------------------------------------------------------------------------------------------------------------------------------------------------------------------------------------------------------------------------------------------------------------------------------------------|
|                                   | (Enrichment score)              |                                                                                      |          |          | in cluster                                                                                                                                  |                                                                                                                                                                                                                                                                                                                                                                                                                                                                                                                                                                                                                                                                                                                                                                                                                                                                                                                                                                                                                                                                                                                                                                                                                                                                                                                                                                                                                                                                                                                                                                                                                                                                                                                                                                                                                                                                                                                                                                                                                                                                                                                                                                                                                                                                                                                                                                                                                                                                                                                                                                                                                                                                                                                                                                                                                                                                                                                                                                                                                                                                                                                                                                                                                                                                                                                                                                                                                                                                                                                                                                                                                                                                                                                                                                                                                                                                                                                                                                                                                                                                                                                                                                                                                                                                                                                                                                                                                                                                                                                                                                                                                                                                                                                                                                                                                                                                                                                                                                                                                                                                                                                                                                                                                                                                                                                                                                                                                                                                                                                                                                                                                                                                                                                                                                                                                                                                                                                                                                                                                                                                                                                                                                                                                                                                                                                                                                                                                                                                                                                                                                                                                                                                                                                                                                                                                                                                                                                                                                                                                                                                                                                                                                                                                                                                                                                                                                                                                                                                                                                                                                                                                                                                                                                                                                                                                                                                                                                                                                                                                                                                                                                                                                                                                                                                                                                                                                                                                                                                                                                                                                                                                                                                                                                                                                                                                                                                                                                                                                                                                                                                                                                                                                                                                                                                                                                                                                                                                                                                                                                                                                                                                                                                                                                                                                                                                                                                                |
| Protein transport<br>(3.164)      | GO:0046907                      | Intracellular transport                                                              | 51       | 4.20E-07 | 79                                                                                                                                          | AAAS, ACD, APBA2, APBA3, APP, ARFGAP2, ARHGAP33, ATG16L2, ATP5D, ATP5O, BAX, BBS2, BCL2L1, BET1L, BID, CALR, CBY1, CDC37, CHKB, CHMP1A, CHMP2A, CLTC, COPE, CSE1L, CTSA, DDX19B, DSCR3, EIF4ENIF1, FLNA, FTH1, GDI1, GGA1, GIPC1, GNAS, GNPTG, HNRNPA1, KLC1, LIN7B, MAPK8IP3, MLH3, MRPL45, MYL6, NAPA, NDUFA13, NEDD8, NFKBIB, NUP88, NUPL1, OS9, PABPN1, PAX6, PICK1, PRKCB, RAB15, RAB18, RAB26, RAB3IP, RAB40B, RANBP1, RANGRF, RHOT1, RPAIN, RPL23, SCAMP5, SCYL1, SNAP25, SNUPN, SPTBN4, STARD3, STX10, STX8, TIMM8B, TIMM9, TOMM40, TRAPPC4, TRIM3, VAMP2, YWHAE, YWHAH                                                                                                                                                                                                                                                                                                                                                                                                                                                                                                                                                                                                                                                                                                                                                                                                                                                                                                                                                                                                                                                                                                                                                                                                                                                                                                                                                                                                                                                                                                                                                                                                                                                                                                                                                                                                                                                                                                                                                                                                                                                                                                                                                                                                                                                                                                                                                                                                                                                                                                                                                                                                                                                                                                                                                                                                                                                                                                                                                                                                                                                                                                                                                                                                                                                                                                                                                                                                                                                                                                                                                                                                                                                                                                                                                                                                                                                                                                                                                                                                                                                                                                                                                                                                                                                                                                                                                                                                                                                                                                                                                                                                                                                                                                                                                                                                                                                                                                                                                                                                                                                                                                                                                                                                                                                                                                                                                                                                                                                                                                                                                                                                                                                                                                                                                                                                                                                                                                                                                                                                                                                                                                                                                                                                                                                                                                                                                                                                                                                                                                                                                                                                                                                                                                                                                                                                                                                                                                                                                                                                                                                                                                                                                                                                                                                                                                                                                                                                                                                                                                                                                                                                                                                                                                                                                                                                                                                                                                                                                                                                                                                                                                                                                                                                                                                                                                                                                                                                                                                                                                                                                                                                                                                                                                                                                                                                                                                                                                                                                                                                                                                                                                                                                                                                                                                                                                |
|                                   | GO:0008104                      | Protein localization                                                                 | 59       | 5.57E-06 |                                                                                                                                             |                                                                                                                                                                                                                                                                                                                                                                                                                                                                                                                                                                                                                                                                                                                                                                                                                                                                                                                                                                                                                                                                                                                                                                                                                                                                                                                                                                                                                                                                                                                                                                                                                                                                                                                                                                                                                                                                                                                                                                                                                                                                                                                                                                                                                                                                                                                                                                                                                                                                                                                                                                                                                                                                                                                                                                                                                                                                                                                                                                                                                                                                                                                                                                                                                                                                                                                                                                                                                                                                                                                                                                                                                                                                                                                                                                                                                                                                                                                                                                                                                                                                                                                                                                                                                                                                                                                                                                                                                                                                                                                                                                                                                                                                                                                                                                                                                                                                                                                                                                                                                                                                                                                                                                                                                                                                                                                                                                                                                                                                                                                                                                                                                                                                                                                                                                                                                                                                                                                                                                                                                                                                                                                                                                                                                                                                                                                                                                                                                                                                                                                                                                                                                                                                                                                                                                                                                                                                                                                                                                                                                                                                                                                                                                                                                                                                                                                                                                                                                                                                                                                                                                                                                                                                                                                                                                                                                                                                                                                                                                                                                                                                                                                                                                                                                                                                                                                                                                                                                                                                                                                                                                                                                                                                                                                                                                                                                                                                                                                                                                                                                                                                                                                                                                                                                                                                                                                                                                                                                                                                                                                                                                                                                                                                                                                                                                                                                                                                                |
|                                   | GO:0045184                      | Establishment of protein localization                                                | 49       | 1.38E-04 |                                                                                                                                             |                                                                                                                                                                                                                                                                                                                                                                                                                                                                                                                                                                                                                                                                                                                                                                                                                                                                                                                                                                                                                                                                                                                                                                                                                                                                                                                                                                                                                                                                                                                                                                                                                                                                                                                                                                                                                                                                                                                                                                                                                                                                                                                                                                                                                                                                                                                                                                                                                                                                                                                                                                                                                                                                                                                                                                                                                                                                                                                                                                                                                                                                                                                                                                                                                                                                                                                                                                                                                                                                                                                                                                                                                                                                                                                                                                                                                                                                                                                                                                                                                                                                                                                                                                                                                                                                                                                                                                                                                                                                                                                                                                                                                                                                                                                                                                                                                                                                                                                                                                                                                                                                                                                                                                                                                                                                                                                                                                                                                                                                                                                                                                                                                                                                                                                                                                                                                                                                                                                                                                                                                                                                                                                                                                                                                                                                                                                                                                                                                                                                                                                                                                                                                                                                                                                                                                                                                                                                                                                                                                                                                                                                                                                                                                                                                                                                                                                                                                                                                                                                                                                                                                                                                                                                                                                                                                                                                                                                                                                                                                                                                                                                                                                                                                                                                                                                                                                                                                                                                                                                                                                                                                                                                                                                                                                                                                                                                                                                                                                                                                                                                                                                                                                                                                                                                                                                                                                                                                                                                                                                                                                                                                                                                                                                                                                                                                                                                                                                                |
|                                   | GO:0015031                      | Protein transport                                                                    | 48       | 2.05E-04 |                                                                                                                                             |                                                                                                                                                                                                                                                                                                                                                                                                                                                                                                                                                                                                                                                                                                                                                                                                                                                                                                                                                                                                                                                                                                                                                                                                                                                                                                                                                                                                                                                                                                                                                                                                                                                                                                                                                                                                                                                                                                                                                                                                                                                                                                                                                                                                                                                                                                                                                                                                                                                                                                                                                                                                                                                                                                                                                                                                                                                                                                                                                                                                                                                                                                                                                                                                                                                                                                                                                                                                                                                                                                                                                                                                                                                                                                                                                                                                                                                                                                                                                                                                                                                                                                                                                                                                                                                                                                                                                                                                                                                                                                                                                                                                                                                                                                                                                                                                                                                                                                                                                                                                                                                                                                                                                                                                                                                                                                                                                                                                                                                                                                                                                                                                                                                                                                                                                                                                                                                                                                                                                                                                                                                                                                                                                                                                                                                                                                                                                                                                                                                                                                                                                                                                                                                                                                                                                                                                                                                                                                                                                                                                                                                                                                                                                                                                                                                                                                                                                                                                                                                                                                                                                                                                                                                                                                                                                                                                                                                                                                                                                                                                                                                                                                                                                                                                                                                                                                                                                                                                                                                                                                                                                                                                                                                                                                                                                                                                                                                                                                                                                                                                                                                                                                                                                                                                                                                                                                                                                                                                                                                                                                                                                                                                                                                                                                                                                                                                                                                                                |
|                                   | GO:0034613                      | Cellular protein localization                                                        | 29       | 9.35E-04 |                                                                                                                                             |                                                                                                                                                                                                                                                                                                                                                                                                                                                                                                                                                                                                                                                                                                                                                                                                                                                                                                                                                                                                                                                                                                                                                                                                                                                                                                                                                                                                                                                                                                                                                                                                                                                                                                                                                                                                                                                                                                                                                                                                                                                                                                                                                                                                                                                                                                                                                                                                                                                                                                                                                                                                                                                                                                                                                                                                                                                                                                                                                                                                                                                                                                                                                                                                                                                                                                                                                                                                                                                                                                                                                                                                                                                                                                                                                                                                                                                                                                                                                                                                                                                                                                                                                                                                                                                                                                                                                                                                                                                                                                                                                                                                                                                                                                                                                                                                                                                                                                                                                                                                                                                                                                                                                                                                                                                                                                                                                                                                                                                                                                                                                                                                                                                                                                                                                                                                                                                                                                                                                                                                                                                                                                                                                                                                                                                                                                                                                                                                                                                                                                                                                                                                                                                                                                                                                                                                                                                                                                                                                                                                                                                                                                                                                                                                                                                                                                                                                                                                                                                                                                                                                                                                                                                                                                                                                                                                                                                                                                                                                                                                                                                                                                                                                                                                                                                                                                                                                                                                                                                                                                                                                                                                                                                                                                                                                                                                                                                                                                                                                                                                                                                                                                                                                                                                                                                                                                                                                                                                                                                                                                                                                                                                                                                                                                                                                                                                                                                                                |
| RNA processing<br>(2.954)         | GO:0070727                      | Cellular macromolecule localization                                                  | 29       | 1.06E-03 | 39                                                                                                                                          | APLP1, APP, ARL6IP4, BCAS2, CELF1, CSTF3, DDX17, DDX5, DDX54, EXOSC1, GEMIN7, HNRNPA1, HNRNPH3, NHP2L1, NOLC1, NOP2, PABPN1, PAN2, PCBP2, PIN4, POLR21, PPP2R1A, QTRT1, RBM3, RBM39, RBM4, RNH1, RPS24, RPS28, SNRNP70, SNRNP71, SNRNP72, SNRNP73, SNRNP74, SNRNP75, SNRNP76, SNRNP77, SNRNP78, SNRNP79, SNRNP80, SNRNP81, SNRNP82, SNRNP83, SNRNP84, SNRNP85, SNRNP86, SNRNP87, SNRNP88, SNRNP89, SNRNP90, SNRNP91, SNRNP92, SNRNP93, SNRNP94, SNRNP95, SNRNP96, SNRNP97, SNRNP98, SNRNP99, SNRNP100, SNRNP101, SNRNP102, SNRNP103, SNRNP104, SNRNP105, SNRNP106, SNRNP107, SNRNP108, SNRNP109, SNRNP110, SNRNP111, SNRNP112, SNRNP113, SNRNP114, SNRNP115, SNRNP116, SNRNP117, SNRNP118, SNRNP119, SNRNP120, SNRNP121, SNRNP122, SNRNP123, SNRNP124, SNRNP125, SNRNP126, SNRNP127, SNRNP128, SNRNP129, SNRNP130, SNRNP131, SNRNP132, SNRNP133, SNRNP134, SNRNP135, SNRNP136, SNRNP137, SNRNP138, SNRNP139, SNRNP140, SNRNP141, SNRNP142, SNRNP143, SNRNP144, SNRNP145, SNRNP146, SNRNP147, SNRNP148, SNRNP149, SNRNP150, SNRNP151, SNRNP152, SNRNP153, SNRNP154, SNRNP155, SNRNP156, SNRNP157, SNRNP158, SNRNP159, SNRNP160, SNRNP161, SNRNP162, SNRNP163, SNRNP164, SNRNP165, SNRNP166, SNRNP167, SNRNP168, SNRNP169, SNRNP170, SNRNP171, SNRNP172, SNRNP173, SNRNP174, SNRNP175, SNRNP176, SNRNP177, SNRNP178, SNRNP179, SNRNP180, SNRNP181, SNRNP182, SNRNP183, SNRNP184, SNRNP185, SNRNP186, SNRNP187, SNRNP188, SNRNP189, SNRNP190, SNRNP191, SNRNP192, SNRNP193, SNRNP194, SNRNP195, SNRNP196, SNRNP197, SNRNP198, SNRNP199, SNRNP200, SNRNP201, SNRNP202, SNRNP203, SNRNP204, SNRNP205, SNRNP206, SNRNP207, SNRNP208, SNRNP209, SNRNP210, SNRNP211, SNRNP212, SNRNP213, SNRNP214, SNRNP215, SNRNP216, SNRNP217, SNRNP218, SNRNP219, SNRNP220, SNRNP221, SNRNP222, SNRNP223, SNRNP224, SNRNP225, SNRNP226, SNRNP227, SNRNP228, SNRNP229, SNRNP230, SNRNP231, SNRNP232, SNRNP233, SNRNP234, SNRNP235, SNRNP236, SNRNP237, SNRNP238, SNRNP239, SNRNP240, SNRNP241, SNRNP242, SNRNP243, SNRNP244, SNRNP245, SNRNP246, SNRNP247, SNRNP248, SNRNP249, SNRNP250, SNRNP251, SNRNP252, SNRNP253, SNRNP254, SNRNP255, SNRNP256, SNRNP257, SNRNP258, SNRNP259, SNRNP260, SNRNP261, SNRNP262, SNRNP263, SNRNP264, SNRNP265, SNRNP266, SNRNP267, SNRNP268, SNRNP269, SNRNP270, SNRNP271, SNRNP272, SNRNP273, SNRNP274, SNRNP275, SNRNP276, SNRNP277, SNRNP278, SNRNP279, SNRNP280, SNRNP281, SNRNP282, SNRNP283, SNRNP284, SNRNP285, SNRNP286, SNRNP287, SNRNP288, SNRNP289, SNRNP290, SNRNP291, SNRNP292, SNRNP293, SNRNP294, SNRNP295, SNRNP296, SNRNP297, SNRNP298, SNRNP299, SNRNP300, SNRNP301, SNRNP302, SNRNP303, SNRNP304, SNRNP305, SNRNP306, SNRNP307, SNRNP308, SNRNP309, SNRNP310, SNRNP311, SNRNP312, SNRNP313, SNRNP314, SNRNP315, SNRNP316, SNRNP317, SNRNP318, SNRNP319, SNRNP320, SNRNP321, SNRNP322, SNRNP323, SNRNP324, SNRNP325, SNRNP326, SNRNP327, SNRNP328, SNRNP329, SNRNP330, SNRNP331, SNRNP332, SNRNP333, SNRNP334, SNRNP335, SNRNP336, SNRNP337, SNRNP338, SNRNP339, SNRNP340, SNRNP341, SNRNP342, SNRNP343, SNRNP344, SNRNP345, SNRNP346, SNRNP347, SNRNP348, SNRNP349, SNRNP350, SNRNP351, SNRNP352, SNRNP353, SNRNP354, SNRNP355, SNRNP356, SNRNP357, SNRNP358, SNRNP359, SNRNP360, SNRNP361, SNRNP362, SNRNP363, SNRNP364, SNRNP365, SNRNP366, SNRNP367, SNRNP368, SNRNP369, SNRNP370, SNRNP371, SNRNP372, SNRNP373, SNRNP374, SNRNP375, SNRNP376, SNRNP377, SNRNP378, SNRNP379, SNRNP380, SNRNP381, SNRNP382, SNRNP383, SNRNP384, SNRNP385, SNRNP386, SNRNP387, SNRNP388, SNRNP389, SNRNP390, SNRNP391, SNRNP392, SNRNP393, SNRNP394, SNRNP395, SNRNP396, SNRNP397, SNRNP398, SNRNP399, SNRNP400, SNRNP401, SNRNP402, SNRNP403, SNRNP404, SNRNP405, SNRNP406, SNRNP407, SNRNP408, SNRNP409, SNRNP410, SNRNP411, SNRNP412, SNRNP413, SNRNP414, SNRNP415, SNRNP416, SNRNP417, SNRNP418, SNRNP419, SNRNP420, SNRNP421, SNRNP422, SNRNP423, SNRNP424, SNRNP425, SNRNP426, SNRNP427, SNRNP428, SNRNP429, SNRNP430, SNRNP431, SNRNP432, SNRNP433, SNRNP434, SNRNP435, SNRNP436, SNRNP437, SNRNP438, SNRNP439, SNRNP440, SNRNP441, SNRNP442, SNRNP443, SNRNP444, SNRNP445, SNRNP446, SNRNP447, SNRNP448, SNRNP449, SNRNP450, SNRNP451, SNRNP452, SNRNP453, SNRNP454, SNRNP455, SNRNP456, SNRNP457, SNRNP458, SNRNP459, SNRNP460, SNRNP461, SNRNP462, SNRNP463, SNRNP464, SNRNP465, SNRNP466, SNRNP467, SNRNP468, SNRNP469, SNRNP470, SNRNP471, SNRNP472, SNRNP473, SNRNP474, SNRNP475, SNRNP476, SNRNP477, SNRNP478, SNRNP479, SNRNP480, SNRNP481, SNRNP482, SNRNP483, SNRNP484, SNRNP485, SNRNP486, SNRNP487, SNRNP488, SNRNP489, SNRNP490, SNRNP491, SNRNP492, SNRNP493, SNRNP494, SNRNP495, SNRNP496, SNRNP497, SNRNP498, SNRNP499, SNRNP500, SNRNP501, SNRNP502, SNRNP503, SNRNP504, SNRNP505, SNRNP506, SNRNP507, SNRNP508, SNRNP509, SNRNP510, SNRNP511, SNRNP512, SNRNP513, SNRNP514, SNRNP515, SNRNP516, SNRNP517, SNRNP518, SNRNP519, SNRNP520, SNRNP521, SNRNP522, SNRNP523, SNRNP524, SNRNP525, SNRNP526, SNRNP527, SNRNP528, SNRNP529, SNRNP530, SNRNP531, SNRNP532, SNRNP533, SNRNP534, SNRNP535, SNRNP536, SNRNP537, SNRNP538, SNRNP539, SNRNP540, SNRNP541, SNRNP542, SNRNP543, SNRNP544, SNRNP545, SNRNP546, SNRNP547, SNRNP548, SNRNP549, SNRNP550, SNRNP551, SNRNP552, SNRNP553, SNRNP554, SNRNP555, SNRNP556, SNRNP557, SNRNP558, SNRNP559, SNRNP560, SNRNP561, SNRNP562, SNRNP563, SNRNP564, SNRNP565, SNRNP566, SNRNP567, SNRNP568, SNRNP569, SNRNP570, SNRNP571, SNRNP572, SNRNP573, SNRNP574, SNRNP575, SNRNP576, SNRNP577, SNRNP578, SNRNP579, SNRNP580, SNRNP581, SNRNP582, SNRNP583, SNRNP584, SNRNP585, SNRNP586, SNRNP587, SNRNP588, SNRNP589, SNRNP590, SNRNP591, SNRNP592, SNRNP593, SNRNP594, SNRNP595, SNRNP596, SNRNP597, SNRNP598, SNRNP599, SNRNP600, SNRNP601, SNRNP602, SNRNP603, SNRNP604, SNRNP605, SNRNP606, SNRNP607, SNRNP608, SNRNP609, SNRNP610, SNRNP611, SNRNP612, SNRNP613, SNRNP614, SNRNP615, SNRNP616, SNRNP617, SNRNP618, SNRNP619, SNRNP620, SNRNP621, SNRNP622, SNRNP623, SNRNP624, SNRNP625, SNRNP626, SNRNP627, SNRNP628, SNRNP629, SNRNP630, SNRNP631, SNRNP632, SNRNP633, SNRNP634, SNRNP635, SNRNP636, SNRNP637, SNRNP638, SNRNP639, SNRNP640, SNRNP641, SNRNP642, SNRNP643, SNRNP644, SNRNP645, SNRNP646, SNRNP647, SNRNP648, SNRNP649, SNRNP650, SNRNP651, SNRNP652, SNRNP653, SNRNP654, SNRNP655, SNRNP656, SNRNP657, SNRNP658, SNRNP659, SNRNP660, SNRNP661, SNRNP662, SNRNP663, SNRNP664, SNRNP665, SNRNP666, SNRNP667, SNRNP668, SNRNP669, SNRNP670, SNRNP671, SNRNP672, SNRNP673, SNRNP674, SNRNP675, SNRNP676, SNRNP677, SNRNP678, SNRNP679, SNRNP680, SNRNP681, SNRNP682, SNRNP683, SNRNP684, SNRNP685, SNRNP686, SNRNP687, SNRNP688, SNRNP689, SNRNP690, SNRNP691, SNRNP692, SNRNP693, SNRNP694, SNRNP695, SNRNP696, SNRNP697, SNRNP698, SNRNP699, SNRNP700, SNRNP701, SNRNP702, SNRNP703, SNRNP704, SNRNP705, SNRNP706, SNRNP707, SNRNP708, SNRNP709, SNRNP710, SNRNP711, SNRNP712, SNRNP713, SNRNP714, SNRNP715, SNRNP716, SNRNP717, SNRNP718, SNRNP719, SNRNP720, SNRNP721, SNRNP722, SNRNP723, SNRNP724, SNRNP725, SNRNP726, SNRNP727, SNRNP728, SNRNP729, SNRNP730, SNRNP731, SNRNP732, SNRNP733, SNRNP734, SNRNP735, SNRNP736, SNRNP737, SNRNP738, SNRNP739, SNRNP740, SNRNP741, SNRNP742, SNRNP743, SNRNP744, SNRNP745, SNRNP746, SNRNP747, SNRNP748, SNRNP749, SNRNP750, SNRNP751, SNRNP752, SNRNP753, SNRNP754, SNRNP755, SNRNP756, SNRNP757, SNRNP758, SNRNP759, SNRNP760, SNRNP761, SNRNP762, SNRNP763, SNRNP764, SNRNP765, SNRNP766, SNRNP767, SNRNP768, SNRNP769, SNRNP770, SNRNP771, SNRNP772, SNRNP773, SNRNP774, SNRNP775, SNRNP776, SNRNP777, SNRNP778, SNRNP779, SNRNP780, SNRNP781, SNRNP782, SNRNP783, SNRNP784, SNRNP785, SNRNP786, SNRNP787, SNRNP788, SNRNP789, SNRNP790, SNRNP791, SNRNP792, SNRNP793, SNRNP794, SNRNP795, SNRNP796, SNRNP797, SNRNP798, SNRNP799, SNRNP800, SNRNP801, SNRNP802, SNRNP803, SNRNP804, SNRNP805, SNRNP806, SNRNP807, SNRNP808, SNRNP809, SNRNP810, SNRNP811, SNRNP812, SNRNP813, SNRNP814, SNRNP815, SNRNP816, SNRNP817, SNRNP818, SNRNP819, SNRNP820, SNRNP821, SNRNP822, SNRNP823, SNRNP824, SNRNP825, SNRNP826, SNRNP827, SNRNP828, SNRNP829, SNRNP830, SNRNP831, SNRNP832, SNRNP833, SNRNP834, SNRNP835, SNRNP836, SNRNP837, SNRNP838, SNRNP839, SNRNP840, SNRNP841, SNRNP842, SNRNP843, SNRNP844, SNRNP845, SNRNP846, SNRNP847, SNRNP848, SNRNP849, SNRNP850, SNRNP851, SNRNP852, SNRNP853, SNRNP854, SNRNP855, SNRNP856, SNRNP857, SNRNP858, SNRNP859, SNRNP860, SNRNP861, SNRNP862, SNRNP863, SNRNP864, SNRNP865, SNRNP866, SNRNP867, SNRNP868, SNRNP869, SNRNP870, SNRNP871, SNRNP872, SNRNP873, SNRNP874, SNRNP875, SNRNP876, SNRNP877, SNRNP878, SNRNP879, SNRNP880, SNRNP881, SNRNP882, SNRNP883, SNRNP884, SNRNP885, SNRNP886, SNRNP887, SNRNP888, SNRNP889, SNRNP890, SNRNP891, SNRNP892, SNRNP893, SNRNP894, SNRNP895, SNRNP896, SNRNP897, SNRNP898, SNRNP899, SNRNP900, SNRNP901, SNRNP902, SNRNP903, SNRNP904, SNRNP905, SNRNP906, SNRNP907, SNRNP908, SNRNP909, SNRNP910, SNRNP911, SNRNP912, SNRNP913, SNRNP914, SNRNP915, SNRNP916, SNRNP917, SNRNP918, SNRNP919, SNRNP920, SNRNP921, SNRNP922, SNRNP923, SNRNP924, SNRNP925, SNRNP926, SNRNP927, SNRNP928, SNRNP929, SNRNP930, SNRNP931, SNRNP932, SNRNP933, SNRNP934, SNRNP935, SNRNP936, SNRNP937, SNRNP938, SNRNP939, SNRNP940, SNRNP941, SNRNP942, SNRNP943, SNRNP944, SNRNP945, SNRNP946, SNRNP947, SNRNP948, SNRNP949, SNRNP950, SNRNP951, SNRNP952, SNRNP953, SNRNP954, SNRNP955, SNRNP956, SNRNP957, SNRNP958, SNRNP959, SNRNP960, SNRNP961, SNRNP962, SNRNP963, SNRNP964, SNRNP965, SNRNP966, SNRNP967, SNRNP968, SNRNP969, SNRNP970, SNRNP971, SNRNP972, SNRNP973, SNRNP974, SNRNP975, SNRNP976, SNRNP977, SNRNP978, SNRNP979, SNRNP980, SNRNP981, SNRNP982, SNRNP983, SNRNP984, SNRNP985, SNRNP986, SNRNP987, SNRNP988, SNRNP989, SNRNP990, SNRNP991, SNRNP992, SNRNP993, SNRNP994, SNRNP995, SNRNP996, SNRNP997, SNRNP998, SNRNP999, SNRNP1000 |
|                                   | GO:0008380                      | RNA splicing                                                                         | 24       | 2.50E-04 |                                                                                                                                             |                                                                                                                                                                                                                                                                                                                                                                                                                                                                                                                                                                                                                                                                                                                                                                                                                                                                                                                                                                                                                                                                                                                                                                                                                                                                                                                                                                                                                                                                                                                                                                                                                                                                                                                                                                                                                                                                                                                                                                                                                                                                                                                                                                                                                                                                                                                                                                                                                                                                                                                                                                                                                                                                                                                                                                                                                                                                                                                                                                                                                                                                                                                                                                                                                                                                                                                                                                                                                                                                                                                                                                                                                                                                                                                                                                                                                                                                                                                                                                                                                                                                                                                                                                                                                                                                                                                                                                                                                                                                                                                                                                                                                                                                                                                                                                                                                                                                                                                                                                                                                                                                                                                                                                                                                                                                                                                                                                                                                                                                                                                                                                                                                                                                                                                                                                                                                                                                                                                                                                                                                                                                                                                                                                                                                                                                                                                                                                                                                                                                                                                                                                                                                                                                                                                                                                                                                                                                                                                                                                                                                                                                                                                                                                                                                                                                                                                                                                                                                                                                                                                                                                                                                                                                                                                                                                                                                                                                                                                                                                                                                                                                                                                                                                                                                                                                                                                                                                                                                                                                                                                                                                                                                                                                                                                                                                                                                                                                                                                                                                                                                                                                                                                                                                                                                                                                                                                                                                                                                                                                                                                                                                                                                                                                                                                                                                                                                                                                                |
|                                   | GO:0006396                      | RNA processing                                                                       | 37       | 3.59E-04 |                                                                                                                                             |                                                                                                                                                                                                                                                                                                                                                                                                                                                                                                                                                                                                                                                                                                                                                                                                                                                                                                                                                                                                                                                                                                                                                                                                                                                                                                                                                                                                                                                                                                                                                                                                                                                                                                                                                                                                                                                                                                                                                                                                                                                                                                                                                                                                                                                                                                                                                                                                                                                                                                                                                                                                                                                                                                                                                                                                                                                                                                                                                                                                                                                                                                                                                                                                                                                                                                                                                                                                                                                                                                                                                                                                                                                                                                                                                                                                                                                                                                                                                                                                                                                                                                                                                                                                                                                                                                                                                                                                                                                                                                                                                                                                                                                                                                                                                                                                                                                                                                                                                                                                                                                                                                                                                                                                                                                                                                                                                                                                                                                                                                                                                                                                                                                                                                                                                                                                                                                                                                                                                                                                                                                                                                                                                                                                                                                                                                                                                                                                                                                                                                                                                                                                                                                                                                                                                                                                                                                                                                                                                                                                                                                                                                                                                                                                                                                                                                                                                                                                                                                                                                                                                                                                                                                                                                                                                                                                                                                                                                                                                                                                                                                                                                                                                                                                                                                                                                                                                                                                                                                                                                                                                                                                                                                                                                                                                                                                                                                                                                                                                                                                                                                                                                                                                                                                                                                                                                                                                                                                                                                                                                                                                                                                                                                                                                                                                                                                                                                                                |
|                                   | GO:0000375                      | RNA splicing, via transesterification reactions                                      | 15       | 1.26E-03 |                                                                                                                                             |                                                                                                                                                                                                                                                                                                                                                                                                                                                                                                                                                                                                                                                                                                                                                                                                                                                                                                                                                                                                                                                                                                                                                                                                                                                                                                                                                                                                                                                                                                                                                                                                                                                                                                                                                                                                                                                                                                                                                                                                                                                                                                                                                                                                                                                                                                                                                                                                                                                                                                                                                                                                                                                                                                                                                                                                                                                                                                                                                                                                                                                                                                                                                                                                                                                                                                                                                                                                                                                                                                                                                                                                                                                                                                                                                                                                                                                                                                                                                                                                                                                                                                                                                                                                                                                                                                                                                                                                                                                                                                                                                                                                                                                                                                                                                                                                                                                                                                                                                                                                                                                                                                                                                                                                                                                                                                                                                                                                                                                                                                                                                                                                                                                                                                                                                                                                                                                                                                                                                                                                                                                                                                                                                                                                                                                                                                                                                                                                                                                                                                                                                                                                                                                                                                                                                                                                                                                                                                                                                                                                                                                                                                                                                                                                                                                                                                                                                                                                                                                                                                                                                                                                                                                                                                                                                                                                                                                                                                                                                                                                                                                                                                                                                                                                                                                                                                                                                                                                                                                                                                                                                                                                                                                                                                                                                                                                                                                                                                                                                                                                                                                                                                                                                                                                                                                                                                                                                                                                                                                                                                                                                                                                                                                                                                                                                                                                                                                                                |
|                                   | GO:0000377                      | RNA splicing, via transesterification reactions with bulged adenosine as nucleophile | 15       | 1.26E-03 |                                                                                                                                             |                                                                                                                                                                                                                                                                                                                                                                                                                                                                                                                                                                                                                                                                                                                                                                                                                                                                                                                                                                                                                                                                                                                                                                                                                                                                                                                                                                                                                                                                                                                                                                                                                                                                                                                                                                                                                                                                                                                                                                                                                                                                                                                                                                                                                                                                                                                                                                                                                                                                                                                                                                                                                                                                                                                                                                                                                                                                                                                                                                                                                                                                                                                                                                                                                                                                                                                                                                                                                                                                                                                                                                                                                                                                                                                                                                                                                                                                                                                                                                                                                                                                                                                                                                                                                                                                                                                                                                                                                                                                                                                                                                                                                                                                                                                                                                                                                                                                                                                                                                                                                                                                                                                                                                                                                                                                                                                                                                                                                                                                                                                                                                                                                                                                                                                                                                                                                                                                                                                                                                                                                                                                                                                                                                                                                                                                                                                                                                                                                                                                                                                                                                                                                                                                                                                                                                                                                                                                                                                                                                                                                                                                                                                                                                                                                                                                                                                                                                                                                                                                                                                                                                                                                                                                                                                                                                                                                                                                                                                                                                                                                                                                                                                                                                                                                                                                                                                                                                                                                                                                                                                                                                                                                                                                                                                                                                                                                                                                                                                                                                                                                                                                                                                                                                                                                                                                                                                                                                                                                                                                                                                                                                                                                                                                                                                                                                                                                                                                                |
| Phosphorylation<br>(1.918)        | GO:0000398                      | Nuclear mRNA splicing, via spliceosome                                               | 15       | 1.26E-03 | 49                                                                                                                                          | ADRBK1, ADRBK2, AKT2, APP, ATP5D, ATP5G2, ATP5O, AXL, BRSK2, CAMK2G, CDC42BPB, CDK10, CDK17, CDK4, CIT, CLK3, CSK, ERBB3, FGFR2, ILK, MAP2K2, MAPK8IP3, MARK2, MAST1, MATK, MKNK2, MVD, NDUFA3, NDUFB10, NDUFV1, NDUFV3, NEK9, NME2, P2RX7, PHKG2, PICK1, PNCK, PPP1CA, PPP2R1A, PRKCB, PTP4A2, PTPRA, RPS6KL1, SBF1, SCYL1, TRIM28, ULK3, UQCRH, WNK1                                                                                                                                                                                                                                                                                                                                                                                                                                                                                                                                                                                                                                                                                                                                                                                                                                                                                                                                                                                                                                                                                                                                                                                                                                                                                                                                                                                                                                                                                                                                                                                                                                                                                                                                                                                                                                                                                                                                                                                                                                                                                                                                                                                                                                                                                                                                                                                                                                                                                                                                                                                                                                                                                                                                                                                                                                                                                                                                                                                                                                                                                                                                                                                                                                                                                                                                                                                                                                                                                                                                                                                                                                                                                                                                                                                                                                                                                                                                                                                                                                                                                                                                                                                                                                                                                                                                                                                                                                                                                                                                                                                                                                                                                                                                                                                                                                                                                                                                                                                                                                                                                                                                                                                                                                                                                                                                                                                                                                                                                                                                                                                                                                                                                                                                                                                                                                                                                                                                                                                                                                                                                                                                                                                                                                                                                                                                                                                                                                                                                                                                                                                                                                                                                                                                                                                                                                                                                                                                                                                                                                                                                                                                                                                                                                                                                                                                                                                                                                                                                                                                                                                                                                                                                                                                                                                                                                                                                                                                                                                                                                                                                                                                                                                                                                                                                                                                                                                                                                                                                                                                                                                                                                                                                                                                                                                                                                                                                                                                                                                                                                                                                                                                                                                                                                                                                                                                                                                                                                                                                                                         |
|                                   | GO:0006397                      | mRNA processing                                                                      | 23       | 2.98E-03 |                                                                                                                                             |                                                                                                                                                                                                                                                                                                                                                                                                                                                                                                                                                                                                                                                                                                                                                                                                                                                                                                                                                                                                                                                                                                                                                                                                                                                                                                                                                                                                                                                                                                                                                                                                                                                                                                                                                                                                                                                                                                                                                                                                                                                                                                                                                                                                                                                                                                                                                                                                                                                                                                                                                                                                                                                                                                                                                                                                                                                                                                                                                                                                                                                                                                                                                                                                                                                                                                                                                                                                                                                                                                                                                                                                                                                                                                                                                                                                                                                                                                                                                                                                                                                                                                                                                                                                                                                                                                                                                                                                                                                                                                                                                                                                                                                                                                                                                                                                                                                                                                                                                                                                                                                                                                                                                                                                                                                                                                                                                                                                                                                                                                                                                                                                                                                                                                                                                                                                                                                                                                                                                                                                                                                                                                                                                                                                                                                                                                                                                                                                                                                                                                                                                                                                                                                                                                                                                                                                                                                                                                                                                                                                                                                                                                                                                                                                                                                                                                                                                                                                                                                                                                                                                                                                                                                                                                                                                                                                                                                                                                                                                                                                                                                                                                                                                                                                                                                                                                                                                                                                                                                                                                                                                                                                                                                                                                                                                                                                                                                                                                                                                                                                                                                                                                                                                                                                                                                                                                                                                                                                                                                                                                                                                                                                                                                                                                                                                                                                                                                                                |
|                                   | GO:0016071                      | mRNA metabolic process                                                               | 25       | 3.98E-03 |                                                                                                                                             |                                                                                                                                                                                                                                                                                                                                                                                                                                                                                                                                                                                                                                                                                                                                                                                                                                                                                                                                                                                                                                                                                                                                                                                                                                                                                                                                                                                                                                                                                                                                                                                                                                                                                                                                                                                                                                                                                                                                                                                                                                                                                                                                                                                                                                                                                                                                                                                                                                                                                                                                                                                                                                                                                                                                                                                                                                                                                                                                                                                                                                                                                                                                                                                                                                                                                                                                                                                                                                                                                                                                                                                                                                                                                                                                                                                                                                                                                                                                                                                                                                                                                                                                                                                                                                                                                                                                                                                                                                                                                                                                                                                                                                                                                                                                                                                                                                                                                                                                                                                                                                                                                                                                                                                                                                                                                                                                                                                                                                                                                                                                                                                                                                                                                                                                                                                                                                                                                                                                                                                                                                                                                                                                                                                                                                                                                                                                                                                                                                                                                                                                                                                                                                                                                                                                                                                                                                                                                                                                                                                                                                                                                                                                                                                                                                                                                                                                                                                                                                                                                                                                                                                                                                                                                                                                                                                                                                                                                                                                                                                                                                                                                                                                                                                                                                                                                                                                                                                                                                                                                                                                                                                                                                                                                                                                                                                                                                                                                                                                                                                                                                                                                                                                                                                                                                                                                                                                                                                                                                                                                                                                                                                                                                                                                                                                                                                                                                                                                |
|                                   | GO:0016310                      | Phosphorylation                                                                      | 45       | 3.27E-03 |                                                                                                                                             |                                                                                                                                                                                                                                                                                                                                                                                                                                                                                                                                                                                                                                                                                                                                                                                                                                                                                                                                                                                                                                                                                                                                                                                                                                                                                                                                                                                                                                                                                                                                                                                                                                                                                                                                                                                                                                                                                                                                                                                                                                                                                                                                                                                                                                                                                                                                                                                                                                                                                                                                                                                                                                                                                                                                                                                                                                                                                                                                                                                                                                                                                                                                                                                                                                                                                                                                                                                                                                                                                                                                                                                                                                                                                                                                                                                                                                                                                                                                                                                                                                                                                                                                                                                                                                                                                                                                                                                                                                                                                                                                                                                                                                                                                                                                                                                                                                                                                                                                                                                                                                                                                                                                                                                                                                                                                                                                                                                                                                                                                                                                                                                                                                                                                                                                                                                                                                                                                                                                                                                                                                                                                                                                                                                                                                                                                                                                                                                                                                                                                                                                                                                                                                                                                                                                                                                                                                                                                                                                                                                                                                                                                                                                                                                                                                                                                                                                                                                                                                                                                                                                                                                                                                                                                                                                                                                                                                                                                                                                                                                                                                                                                                                                                                                                                                                                                                                                                                                                                                                                                                                                                                                                                                                                                                                                                                                                                                                                                                                                                                                                                                                                                                                                                                                                                                                                                                                                                                                                                                                                                                                                                                                                                                                                                                                                                                                                                                                                                |
|                                   | GO:0006796                      | Phosphate metabolic process                                                          | 49       | 1.61E-02 |                                                                                                                                             |                                                                                                                                                                                                                                                                                                                                                                                                                                                                                                                                                                                                                                                                                                                                                                                                                                                                                                                                                                                                                                                                                                                                                                                                                                                                                                                                                                                                                                                                                                                                                                                                                                                                                                                                                                                                                                                                                                                                                                                                                                                                                                                                                                                                                                                                                                                                                                                                                                                                                                                                                                                                                                                                                                                                                                                                                                                                                                                                                                                                                                                                                                                                                                                                                                                                                                                                                                                                                                                                                                                                                                                                                                                                                                                                                                                                                                                                                                                                                                                                                                                                                                                                                                                                                                                                                                                                                                                                                                                                                                                                                                                                                                                                                                                                                                                                                                                                                                                                                                                                                                                                                                                                                                                                                                                                                                                                                                                                                                                                                                                                                                                                                                                                                                                                                                                                                                                                                                                                                                                                                                                                                                                                                                                                                                                                                                                                                                                                                                                                                                                                                                                                                                                                                                                                                                                                                                                                                                                                                                                                                                                                                                                                                                                                                                                                                                                                                                                                                                                                                                                                                                                                                                                                                                                                                                                                                                                                                                                                                                                                                                                                                                                                                                                                                                                                                                                                                                                                                                                                                                                                                                                                                                                                                                                                                                                                                                                                                                                                                                                                                                                                                                                                                                                                                                                                                                                                                                                                                                                                                                                                                                                                                                                                                                                                                                                                                                                                                |
| Gene silencing<br>(1.762)         | GO:0006793                      | Phosphorus metabolic process                                                         | 49       | 1.61E-02 | 10                                                                                                                                          | CELF1, CHMP1A, HDAC10, HDAC5, RBM3, RBM4, SIRT2, SIRT6, SMARCA4, TNRC6C                                                                                                                                                                                                                                                                                                                                                                                                                                                                                                                                                                                                                                                                                                                                                                                                                                                                                                                                                                                                                                                                                                                                                                                                                                                                                                                                                                                                                                                                                                                                                                                                                                                                                                                                                                                                                                                                                                                                                                                                                                                                                                                                                                                                                                                                                                                                                                                                                                                                                                                                                                                                                                                                                                                                                                                                                                                                                                                                                                                                                                                                                                                                                                                                                                                                                                                                                                                                                                                                                                                                                                                                                                                                                                                                                                                                                                                                                                                                                                                                                                                                                                                                                                                                                                                                                                                                                                                                                                                                                                                                                                                                                                                                                                                                                                                                                                                                                                                                                                                                                                                                                                                                                                                                                                                                                                                                                                                                                                                                                                                                                                                                                                                                                                                                                                                                                                                                                                                                                                                                                                                                                                                                                                                                                                                                                                                                                                                                                                                                                                                                                                                                                                                                                                                                                                                                                                                                                                                                                                                                                                                                                                                                                                                                                                                                                                                                                                                                                                                                                                                                                                                                                                                                                                                                                                                                                                                                                                                                                                                                                                                                                                                                                                                                                                                                                                                                                                                                                                                                                                                                                                                                                                                                                                                                                                                                                                                                                                                                                                                                                                                                                                                                                                                                                                                                                                                                                                                                                                                                                                                                                                                                                                                                                                                                                                                                        |
|                                   | GO:0006468                      | Protein amino acid phosphorylation                                                   | 35       | 2.52E-02 |                                                                                                                                             |                                                                                                                                                                                                                                                                                                                                                                                                                                                                                                                                                                                                                                                                                                                                                                                                                                                                                                                                                                                                                                                                                                                                                                                                                                                                                                                                                                                                                                                                                                                                                                                                                                                                                                                                                                                                                                                                                                                                                                                                                                                                                                                                                                                                                                                                                                                                                                                                                                                                                                                                                                                                                                                                                                                                                                                                                                                                                                                                                                                                                                                                                                                                                                                                                                                                                                                                                                                                                                                                                                                                                                                                                                                                                                                                                                                                                                                                                                                                                                                                                                                                                                                                                                                                                                                                                                                                                                                                                                                                                                                                                                                                                                                                                                                                                                                                                                                                                                                                                                                                                                                                                                                                                                                                                                                                                                                                                                                                                                                                                                                                                                                                                                                                                                                                                                                                                                                                                                                                                                                                                                                                                                                                                                                                                                                                                                                                                                                                                                                                                                                                                                                                                                                                                                                                                                                                                                                                                                                                                                                                                                                                                                                                                                                                                                                                                                                                                                                                                                                                                                                                                                                                                                                                                                                                                                                                                                                                                                                                                                                                                                                                                                                                                                                                                                                                                                                                                                                                                                                                                                                                                                                                                                                                                                                                                                                                                                                                                                                                                                                                                                                                                                                                                                                                                                                                                                                                                                                                                                                                                                                                                                                                                                                                                                                                                                                                                                                                                |
|                                   | GO:0016458                      | Gene silencing                                                                       | 8        | 3.78E-03 |                                                                                                                                             |                                                                                                                                                                                                                                                                                                                                                                                                                                                                                                                                                                                                                                                                                                                                                                                                                                                                                                                                                                                                                                                                                                                                                                                                                                                                                                                                                                                                                                                                                                                                                                                                                                                                                                                                                                                                                                                                                                                                                                                                                                                                                                                                                                                                                                                                                                                                                                                                                                                                                                                                                                                                                                                                                                                                                                                                                                                                                                                                                                                                                                                                                                                                                                                                                                                                                                                                                                                                                                                                                                                                                                                                                                                                                                                                                                                                                                                                                                                                                                                                                                                                                                                                                                                                                                                                                                                                                                                                                                                                                                                                                                                                                                                                                                                                                                                                                                                                                                                                                                                                                                                                                                                                                                                                                                                                                                                                                                                                                                                                                                                                                                                                                                                                                                                                                                                                                                                                                                                                                                                                                                                                                                                                                                                                                                                                                                                                                                                                                                                                                                                                                                                                                                                                                                                                                                                                                                                                                                                                                                                                                                                                                                                                                                                                                                                                                                                                                                                                                                                                                                                                                                                                                                                                                                                                                                                                                                                                                                                                                                                                                                                                                                                                                                                                                                                                                                                                                                                                                                                                                                                                                                                                                                                                                                                                                                                                                                                                                                                                                                                                                                                                                                                                                                                                                                                                                                                                                                                                                                                                                                                                                                                                                                                                                                                                                                                                                                                                                |
| Chromatin modification<br>(1.385) | GO:0006476                      | Protein amino acid deacetylation                                                     | 5        | 7.24E-03 | 19                                                                                                                                          | BANP, BPTF, BRD1, C20ORF20, CREBBP, HDAC10, HDAC5, HSF4, KAT2A, KAT5, KDM2B, PHF21A, RBM4, SIRT2, SIRT6, SMARCA1, SMARCA4, SMARCC2, SMARCE1                                                                                                                                                                                                                                                                                                                                                                                                                                                                                                                                                                                                                                                                                                                                                                                                                                                                                                                                                                                                                                                                                                                                                                                                                                                                                                                                                                                                                                                                                                                                                                                                                                                                                                                                                                                                                                                                                                                                                                                                                                                                                                                                                                                                                                                                                                                                                                                                                                                                                                                                                                                                                                                                                                                                                                                                                                                                                                                                                                                                                                                                                                                                                                                                                                                                                                                                                                                                                                                                                                                                                                                                                                                                                                                                                                                                                                                                                                                                                                                                                                                                                                                                                                                                                                                                                                                                                                                                                                                                                                                                                                                                                                                                                                                                                                                                                                                                                                                                                                                                                                                                                                                                                                                                                                                                                                                                                                                                                                                                                                                                                                                                                                                                                                                                                                                                                                                                                                                                                                                                                                                                                                                                                                                                                                                                                                                                                                                                                                                                                                                                                                                                                                                                                                                                                                                                                                                                                                                                                                                                                                                                                                                                                                                                                                                                                                                                                                                                                                                                                                                                                                                                                                                                                                                                                                                                                                                                                                                                                                                                                                                                                                                                                                                                                                                                                                                                                                                                                                                                                                                                                                                                                                                                                                                                                                                                                                                                                                                                                                                                                                                                                                                                                                                                                                                                                                                                                                                                                                                                                                                                                                                                                                                                                                                                    |
|                                   | GO:0006342                      | Chromatin silencing                                                                  | 4        | 2.53E-02 |                                                                                                                                             |                                                                                                                                                                                                                                                                                                                                                                                                                                                                                                                                                                                                                                                                                                                                                                                                                                                                                                                                                                                                                                                                                                                                                                                                                                                                                                                                                                                                                                                                                                                                                                                                                                                                                                                                                                                                                                                                                                                                                                                                                                                                                                                                                                                                                                                                                                                                                                                                                                                                                                                                                                                                                                                                                                                                                                                                                                                                                                                                                                                                                                                                                                                                                                                                                                                                                                                                                                                                                                                                                                                                                                                                                                                                                                                                                                                                                                                                                                                                                                                                                                                                                                                                                                                                                                                                                                                                                                                                                                                                                                                                                                                                                                                                                                                                                                                                                                                                                                                                                                                                                                                                                                                                                                                                                                                                                                                                                                                                                                                                                                                                                                                                                                                                                                                                                                                                                                                                                                                                                                                                                                                                                                                                                                                                                                                                                                                                                                                                                                                                                                                                                                                                                                                                                                                                                                                                                                                                                                                                                                                                                                                                                                                                                                                                                                                                                                                                                                                                                                                                                                                                                                                                                                                                                                                                                                                                                                                                                                                                                                                                                                                                                                                                                                                                                                                                                                                                                                                                                                                                                                                                                                                                                                                                                                                                                                                                                                                                                                                                                                                                                                                                                                                                                                                                                                                                                                                                                                                                                                                                                                                                                                                                                                                                                                                                                                                                                                                                                |
|                                   | GO:0045814                      | Negative regulation of gene expression, epigenetic                                   | 4        | 3.81E-02 |                                                                                                                                             |                                                                                                                                                                                                                                                                                                                                                                                                                                                                                                                                                                                                                                                                                                                                                                                                                                                                                                                                                                                                                                                                                                                                                                                                                                                                                                                                                                                                                                                                                                                                                                                                                                                                                                                                                                                                                                                                                                                                                                                                                                                                                                                                                                                                                                                                                                                                                                                                                                                                                                                                                                                                                                                                                                                                                                                                                                                                                                                                                                                                                                                                                                                                                                                                                                                                                                                                                                                                                                                                                                                                                                                                                                                                                                                                                                                                                                                                                                                                                                                                                                                                                                                                                                                                                                                                                                                                                                                                                                                                                                                                                                                                                                                                                                                                                                                                                                                                                                                                                                                                                                                                                                                                                                                                                                                                                                                                                                                                                                                                                                                                                                                                                                                                                                                                                                                                                                                                                                                                                                                                                                                                                                                                                                                                                                                                                                                                                                                                                                                                                                                                                                                                                                                                                                                                                                                                                                                                                                                                                                                                                                                                                                                                                                                                                                                                                                                                                                                                                                                                                                                                                                                                                                                                                                                                                                                                                                                                                                                                                                                                                                                                                                                                                                                                                                                                                                                                                                                                                                                                                                                                                                                                                                                                                                                                                                                                                                                                                                                                                                                                                                                                                                                                                                                                                                                                                                                                                                                                                                                                                                                                                                                                                                                                                                                                                                                                                                                                                |
|                                   | GO:0006476                      | Protein amino acid deacetylation                                                     | 5        | 7.24E-03 |                                                                                                                                             |                                                                                                                                                                                                                                                                                                                                                                                                                                                                                                                                                                                                                                                                                                                                                                                                                                                                                                                                                                                                                                                                                                                                                                                                                                                                                                                                                                                                                                                                                                                                                                                                                                                                                                                                                                                                                                                                                                                                                                                                                                                                                                                                                                                                                                                                                                                                                                                                                                                                                                                                                                                                                                                                                                                                                                                                                                                                                                                                                                                                                                                                                                                                                                                                                                                                                                                                                                                                                                                                                                                                                                                                                                                                                                                                                                                                                                                                                                                                                                                                                                                                                                                                                                                                                                                                                                                                                                                                                                                                                                                                                                                                                                                                                                                                                                                                                                                                                                                                                                                                                                                                                                                                                                                                                                                                                                                                                                                                                                                                                                                                                                                                                                                                                                                                                                                                                                                                                                                                                                                                                                                                                                                                                                                                                                                                                                                                                                                                                                                                                                                                                                                                                                                                                                                                                                                                                                                                                                                                                                                                                                                                                                                                                                                                                                                                                                                                                                                                                                                                                                                                                                                                                                                                                                                                                                                                                                                                                                                                                                                                                                                                                                                                                                                                                                                                                                                                                                                                                                                                                                                                                                                                                                                                                                                                                                                                                                                                                                                                                                                                                                                                                                                                                                                                                                                                                                                                                                                                                                                                                                                                                                                                                                                                                                                                                                                                                                                                                |
| GO:0016568                        | Chromatin modification          | 18                                                                                   | 2.08E-02 | 19       | BANP, BPTF, BRD1, C20ORF20, CREBBP, HDAC10, HDAC5, HSF4, KAT2A, KAT5, KDM2B, PHF21A, RBM4, SIRT2, SIRT6, SMARCA1, SMARCA4, SMARCC2, SMARCE1 |                                                                                                                                                                                                                                                                                                                                                                                                                                                                                                                                                                                                                                                                                                                                                                                                                                                                                                                                                                                                                                                                                                                                                                                                                                                                                                                                                                                                                                                                                                                                                                                                                                                                                                                                                                                                                                                                                                                                                                                                                                                                                                                                                                                                                                                                                                                                                                                                                                                                                                                                                                                                                                                                                                                                                                                                                                                                                                                                                                                                                                                                                                                                                                                                                                                                                                                                                                                                                                                                                                                                                                                                                                                                                                                                                                                                                                                                                                                                                                                                                                                                                                                                                                                                                                                                                                                                                                                                                                                                                                                                                                                                                                                                                                                                                                                                                                                                                                                                                                                                                                                                                                                                                                                                                                                                                                                                                                                                                                                                                                                                                                                                                                                                                                                                                                                                                                                                                                                                                                                                                                                                                                                                                                                                                                                                                                                                                                                                                                                                                                                                                                                                                                                                                                                                                                                                                                                                                                                                                                                                                                                                                                                                                                                                                                                                                                                                                                                                                                                                                                                                                                                                                                                                                                                                                                                                                                                                                                                                                                                                                                                                                                                                                                                                                                                                                                                                                                                                                                                                                                                                                                                                                                                                                                                                                                                                                                                                                                                                                                                                                                                                                                                                                                                                                                                                                                                                                                                                                                                                                                                                                                                                                                                                                                                                                                                                                                                                                |
| GO:0016575                        | Histone deacetylation           | 4                                                                                    | 2.16E-02 |          |                                                                                                                                             |                                                                                                                                                                                                                                                                                                                                                                                                                                                                                                                                                                                                                                                                                                                                                                                                                                                                                                                                                                                                                                                                                                                                                                                                                                                                                                                                                                                                                                                                                                                                                                                                                                                                                                                                                                                                                                                                                                                                                                                                                                                                                                                                                                                                                                                                                                                                                                                                                                                                                                                                                                                                                                                                                                                                                                                                                                                                                                                                                                                                                                                                                                                                                                                                                                                                                                                                                                                                                                                                                                                                                                                                                                                                                                                                                                                                                                                                                                                                                                                                                                                                                                                                                                                                                                                                                                                                                                                                                                                                                                                                                                                                                                                                                                                                                                                                                                                                                                                                                                                                                                                                                                                                                                                                                                                                                                                                                                                                                                                                                                                                                                                                                                                                                                                                                                                                                                                                                                                                                                                                                                                                                                                                                                                                                                                                                                                                                                                                                                                                                                                                                                                                                                                                                                                                                                                                                                                                                                                                                                                                                                                                                                                                                                                                                                                                                                                                                                                                                                                                                                                                                                                                                                                                                                                                                                                                                                                                                                                                                                                                                                                                                                                                                                                                                                                                                                                                                                                                                                                                                                                                                                                                                                                                                                                                                                                                                                                                                                                                                                                                                                                                                                                                                                                                                                                                                                                                                                                                                                                                                                                                                                                                                                                                                                                                                                                                                                                                                |
| GO:0016569                        | Covalent chromatin modification | 10                                                                                   | 3.82E-02 |          |                                                                                                                                             |                                                                                                                                                                                                                                                                                                                                                                                                                                                                                                                                                                                                                                                                                                                                                                                                                                                                                                                                                                                                                                                                                                                                                                                                                                                                                                                                                                                                                                                                                                                                                                                                                                                                                                                                                                                                                                                                                                                                                                                                                                                                                                                                                                                                                                                                                                                                                                                                                                                                                                                                                                                                                                                                                                                                                                                                                                                                                                                                                                                                                                                                                                                                                                                                                                                                                                                                                                                                                                                                                                                                                                                                                                                                                                                                                                                                                                                                                                                                                                                                                                                                                                                                                                                                                                                                                                                                                                                                                                                                                                                                                                                                                                                                                                                                                                                                                                                                                                                                                                                                                                                                                                                                                                                                                                                                                                                                                                                                                                                                                                                                                                                                                                                                                                                                                                                                                                                                                                                                                                                                                                                                                                                                                                                                                                                                                                                                                                                                                                                                                                                                                                                                                                                                                                                                                                                                                                                                                                                                                                                                                                                                                                                                                                                                                                                                                                                                                                                                                                                                                                                                                                                                                                                                                                                                                                                                                                                                                                                                                                                                                                                                                                                                                                                                                                                                                                                                                                                                                                                                                                                                                                                                                                                                                                                                                                                                                                                                                                                                                                                                                                                                                                                                                                                                                                                                                                                                                                                                                                                                                                                                                                                                                                                                                                                                                                                                                                                                                |



Supplementary Table 8 Top biological pathways from gene ontology analyses of AS genes in sALS

|                                                           | Cluster ID<br>(Enrichment score) | GO term ID                                                            | GO term                                                                              | Count    | P value  | Total genes<br>in cluster                                                                                                                                                                                                                                                                                                                 | Genes                                                                                                                                                                                                                                                                                            |
|-----------------------------------------------------------|----------------------------------|-----------------------------------------------------------------------|--------------------------------------------------------------------------------------|----------|----------|-------------------------------------------------------------------------------------------------------------------------------------------------------------------------------------------------------------------------------------------------------------------------------------------------------------------------------------------|--------------------------------------------------------------------------------------------------------------------------------------------------------------------------------------------------------------------------------------------------------------------------------------------------|
| CEREBELLUM                                                | Cytoskeleton (2.871)             | GO:0007010                                                            | Cytoskeleton organization                                                            | 32       | 1.70E-04 | 32                                                                                                                                                                                                                                                                                                                                        | ABI2, ABL2, ABLIM3, ARHGEF11, BBS4, CAPN10, CAPN3, CDC42, CDC42BPA, CLASP1, CNTR0B, DST, ELN, EPB41, FERMT2, FLNA, FMNL2, HDAC3, KLHL1, LIMCH1, MAP2, MARK1, MICAL1, MYH10, PCNT, PLD2, PRC1, SMC3, SORBS1, TRPM7, TUBGCP4                                                                       |
|                                                           |                                  | GO:0030036                                                            | Actin cytoskeleton organization                                                      | 18       | 2.73E-03 |                                                                                                                                                                                                                                                                                                                                           |                                                                                                                                                                                                                                                                                                  |
|                                                           |                                  | GO:0030029                                                            | Actin filament-based process                                                         | 18       | 5.25E-03 |                                                                                                                                                                                                                                                                                                                                           |                                                                                                                                                                                                                                                                                                  |
|                                                           | RNA processing<br>(2.515)        | GO:0006396                                                            | RNA processing                                                                       | 39       | 5.22E-05 | 41                                                                                                                                                                                                                                                                                                                                        | BCAS2, CDK5RAP1, CELF1, CPSF1, CPSF6, CSTF3, DDX54, DHX35, ELAC2, EXOSC3, HNRNPH1, HNRPLL, INTS4, INTS6, LUC7L3, MBNL1, NOL3, PABPC4, POP5, PPIL3, PRMT5, PTBP1, PTBP2, QTRT1, RBM3, RBM5, RBMX, RNMT, RNPS1, RPS15, SF1, SNRPN, SRPK2, SRRM1, TARBP1, THOC2, TRA2B, TSR1, U2AF1L4, WIBG, ZRANB2 |
|                                                           |                                  | GO:0006397                                                            | mRNA processing                                                                      | 26       | 1.82E-04 |                                                                                                                                                                                                                                                                                                                                           |                                                                                                                                                                                                                                                                                                  |
|                                                           |                                  | GO:0008380                                                            | RNA splicing                                                                         | 24       | 1.85E-04 |                                                                                                                                                                                                                                                                                                                                           |                                                                                                                                                                                                                                                                                                  |
|                                                           |                                  | GO:0016071                                                            | mRNA metabolic process                                                               | 27       | 6.67E-04 |                                                                                                                                                                                                                                                                                                                                           |                                                                                                                                                                                                                                                                                                  |
|                                                           |                                  | GO:0000398                                                            | Nuclear mRNA splicing, via spliceosome                                               | 14       | 2.98E-03 |                                                                                                                                                                                                                                                                                                                                           |                                                                                                                                                                                                                                                                                                  |
|                                                           |                                  | GO:0000375                                                            | RNA splicing, via transesterification reactions                                      | 14       | 2.98E-03 |                                                                                                                                                                                                                                                                                                                                           |                                                                                                                                                                                                                                                                                                  |
|                                                           |                                  | GO:0000377                                                            | RNA splicing, via transesterification reactions with bulged adenosine as nucleophile | 14       | 2.98E-03 |                                                                                                                                                                                                                                                                                                                                           |                                                                                                                                                                                                                                                                                                  |
| Phosphorylation<br>(1.791)                                | GO:0006468                       | Protein amino acid phosphorylation                                    | 38                                                                                   | 4.16E-03 | 47       | ABI1, ABI2, ABL2, AURKC, BRSK2, CAMK2A, CDC42BPA, CHUK, CLK4, COL4A3BP, CTD1P1, DUSP12, EFNA1, EPHB6, ERC1, FES, GRM4, ILKAP, INPP1, MAP2, MAP3K14, MAP3K9, MAPK10, MAPK12, MARK1, MATK, MTMR2, NDUFV3, OBSCN, PAK6, PRKACB, PTPN4, RPS6KC1, SHC1, SLC20A1, SRPK2, STAT5A, STK25, STK39, TGFA, TLK2, TNK2, TRPM7, ULK3, UQCRH, VRK3, WNK1 |                                                                                                                                                                                                                                                                                                  |
|                                                           | GO:0016310                       | Phosphorylation                                                       | 40                                                                                   | 2.47E-02 |          |                                                                                                                                                                                                                                                                                                                                           |                                                                                                                                                                                                                                                                                                  |
|                                                           | GO:0006793                       | Phosphorus metabolic process                                          | 47                                                                                   | 2.59E-02 |          |                                                                                                                                                                                                                                                                                                                                           |                                                                                                                                                                                                                                                                                                  |
|                                                           | GO:0006796                       | Phosphate metabolic process                                           | 47                                                                                   | 2.59E-02 |          |                                                                                                                                                                                                                                                                                                                                           |                                                                                                                                                                                                                                                                                                  |
| Cell projection<br>(1.333)                                | GO:0030031                       | Cell projection assembly                                              | 10                                                                                   | 2.54E-03 | 15       | ABI2, BBS4, CCDC88A, CDC42, IFT172, IFT88, ITGB4, KLHL1, MAP2, MCF2, MYH10, PCNT, SH2B1, TTC8                                                                                                                                                                                                                                             |                                                                                                                                                                                                                                                                                                  |
|                                                           | GO:0060271                       | Cilium morphogenesis                                                  | 6                                                                                    | 5.60E-03 |          |                                                                                                                                                                                                                                                                                                                                           |                                                                                                                                                                                                                                                                                                  |
| Dendrite (0.277)                                          | GO:0042384                       | Cilium assembly                                                       | 5                                                                                    | 1.60E-02 | 5        | 3.37E-02                                                                                                                                                                                                                                                                                                                                  |                                                                                                                                                                                                                                                                                                  |
|                                                           | GO:0016358                       | Dendrite development                                                  | 5                                                                                    | 3.37E-02 |          |                                                                                                                                                                                                                                                                                                                                           |                                                                                                                                                                                                                                                                                                  |
| Ion transport<br>(0.962)                                  | GO:0030001                       | Metal ion transport                                                   | 25                                                                                   | 3.96E-02 | 38       | ABCC8, AMACR, ANO1, ATP2B3, BEST1, BSPRY, CACNA1B, CACNB4, CAMK2A, CPT1B, CUTC, FXYD6, GABRA2, GRIA2, GRIA4, GRIK4, HEPH, ITPR1, KCNC4, KCNH1, KCNMA1, KCTD17, KCTD3, SCN8A, SCNN1D, SLC20A1, SLC38A6, SLC39A13, SLC3A2, SLC4A3, SLC4A5, SLC5A2, SLC5A6, SLC8A1, TMEM38B, TOMM40L, TRPM7, WNK1                                            |                                                                                                                                                                                                                                                                                                  |
|                                                           | GO:0006811                       | Ion transport                                                         | 37                                                                                   | 4.88E-02 |          |                                                                                                                                                                                                                                                                                                                                           |                                                                                                                                                                                                                                                                                                  |
| Macromolecular<br>complex (0.910)                         | GO:0065003                       | Macromolecular complex assembly                                       | 34                                                                                   | 2.97E-02 | 35       | ABI2, APC, ATG16L1, BCS1L, CELF1, EPRS, ERCC2, FLNA, H3F3A, HLA-DMA, IDE, IRF7, JUP, MBNL1, MTMR2, NAP1L1, NUP98, PEX14, PILRB, PRMT5, RBM5, RPS15, SF1, SLC7A6, SRPK2, TAPBP, THRAP3, TNFRSF1A, TRAF2, TRIM5, TSR1, TUBB6, TUBGCP4, UQCRH, ZFYVE9                                                                                        |                                                                                                                                                                                                                                                                                                  |
|                                                           | GO:0043933                       | Macromolecular complex subunit organization                           | 35                                                                                   | 4.34E-02 |          |                                                                                                                                                                                                                                                                                                                                           |                                                                                                                                                                                                                                                                                                  |
| Regulation of<br>microtubule<br>polymerization<br>(0.860) | GO:0031114                       | Regulation of microtubule depolymerization                            | 4                                                                                    | 1.73E-02 | 8        | APC, ARHGEF11, BBS4, BRSK2, CDC42, CLASP1, CLASP2, DST                                                                                                                                                                                                                                                                                    |                                                                                                                                                                                                                                                                                                  |
|                                                           | GO:0007026                       | Negative regulation of microtubule depolymerization                   | 4                                                                                    | 1.73E-02 |          |                                                                                                                                                                                                                                                                                                                                           |                                                                                                                                                                                                                                                                                                  |
|                                                           | GO:0031111                       | Negative regulation of microtubule polymerization or depolymerization | 4                                                                                    | 2.05E-02 |          |                                                                                                                                                                                                                                                                                                                                           |                                                                                                                                                                                                                                                                                                  |
|                                                           | GO:0031110                       | Regulation of microtubule polymerization or depolymerization          | 5                                                                                    | 2.26E-02 |          |                                                                                                                                                                                                                                                                                                                                           |                                                                                                                                                                                                                                                                                                  |
|                                                           | GO:0032886                       | Regulation of microtubule-based process                               | 6                                                                                    | 2.85E-02 |          |                                                                                                                                                                                                                                                                                                                                           |                                                                                                                                                                                                                                                                                                  |
| Organelle localization<br>(0.837)                         | GO:0007163                       | Establishment or maintenance of cell polarity                         | 6                                                                                    | 2.85E-02 | 7        | ARFGAP1, BBS4, CDC42, GBF1, KIF1B, MYH10, RPS15                                                                                                                                                                                                                                                                                           |                                                                                                                                                                                                                                                                                                  |
|                                                           | GO:0051656                       | Establishment of organelle localization                               | 7                                                                                    | 3.44E-02 |          |                                                                                                                                                                                                                                                                                                                                           |                                                                                                                                                                                                                                                                                                  |
| FRONTAL CORTEX                                            | Phosphorylation<br>(1.656)       | GO:0016310                                                            | Phosphorylation                                                                      | 19       | 7.80E-03 | 19                                                                                                                                                                                                                                                                                                                                        | ABI1, AKT1, APP, ATP5B, ATP5G2, CAMK2G, EIF2AK4, FGFR2, MAPK3, MATK, MINK1, PAK1, PRKCB, SPAG9, STK33, ULK2, ULK3, UQCRH, WNK1                                                                                                                                                                   |
|                                                           |                                  | GO:0006468                                                            | Protein amino acid phosphorylation                                                   | 16       | 1.48E-02 |                                                                                                                                                                                                                                                                                                                                           |                                                                                                                                                                                                                                                                                                  |
|                                                           |                                  | GO:0006793                                                            | Phosphorus metabolic process                                                         | 19       | 4.54E-02 |                                                                                                                                                                                                                                                                                                                                           |                                                                                                                                                                                                                                                                                                  |
|                                                           | Synopsis<br>(1.334)              | GO:0050808                                                            | Synapse organization                                                                 | 4        | 3.72E-02 | 6                                                                                                                                                                                                                                                                                                                                         | ANK3, APBB1, APLP2, APP, CADM1, GLRA2                                                                                                                                                                                                                                                            |
|                                                           |                                  | GO:0043062                                                            | Extracellular structure organization                                                 | 6        | 4.73E-02 |                                                                                                                                                                                                                                                                                                                                           |                                                                                                                                                                                                                                                                                                  |
|                                                           | Cell size<br>(1.316)             | GO:0008361                                                            | Regulation of cell size                                                              | 9        | 3.54E-03 | 9                                                                                                                                                                                                                                                                                                                                         | AKT1, APBB1, APP, CAPRIN2, CGRRF1, FGFR2, FHL1, NDRG4, NDUFA13                                                                                                                                                                                                                                   |
|                                                           |                                  | GO:0032535                                                            | Regulation of cellular component size                                                | 9        | 1.70E-02 |                                                                                                                                                                                                                                                                                                                                           |                                                                                                                                                                                                                                                                                                  |
|                                                           |                                  | GO:0045792                                                            | Negative regulation of cell size                                                     | 5        | 3.17E-02 |                                                                                                                                                                                                                                                                                                                                           |                                                                                                                                                                                                                                                                                                  |
|                                                           |                                  | GO:0016049                                                            | Cell growth                                                                          | 4        | 3.72E-02 |                                                                                                                                                                                                                                                                                                                                           |                                                                                                                                                                                                                                                                                                  |
|                                                           | Cell death<br>(1.228)            | GO:0008219                                                            | Cell death                                                                           | 18       | 6.01E-03 | 18                                                                                                                                                                                                                                                                                                                                        | AKT1, APBB1, APP, BLCAP, CADM1, FAIM2, ITSN1, NCKAP1, NDUFA13, NGFRAP1, PACS2, PAK1, PLP1, PNPLA6, PSME3, RPS3, UBA1, YWHAE                                                                                                                                                                      |
| GO:0016265                                                |                                  | Death                                                                 | 18                                                                                   | 6.43E-03 |          |                                                                                                                                                                                                                                                                                                                                           |                                                                                                                                                                                                                                                                                                  |
| GO:0006915                                                |                                  | Apoptosis                                                             | 15                                                                                   | 1.41E-02 |          |                                                                                                                                                                                                                                                                                                                                           |                                                                                                                                                                                                                                                                                                  |
| GO:0012501                                                |                                  | Programmed cell death                                                 | 15                                                                                   | 1.58E-02 |          |                                                                                                                                                                                                                                                                                                                                           |                                                                                                                                                                                                                                                                                                  |

Supplementary Table 9 Top biological processes from gene ontology analyses of transcripts with APA usage in c9ALS

| Cluster ID (Enrichment score) | GO term ID                                   | Count                                                                                                                                                                                                                                                                                                                                                                                                                                                                                                                       | P value                                      | Total genes in cluster                                                                       | Genes |                                                                                                                                                                                                                                                                                                                                                                                                                                                                                                                                                                                                                                                                                                                                                                                                                                                                                                                                                                                                                                                                                                                                                                                                                                                                                                                                                                       |
|-------------------------------|----------------------------------------------|-----------------------------------------------------------------------------------------------------------------------------------------------------------------------------------------------------------------------------------------------------------------------------------------------------------------------------------------------------------------------------------------------------------------------------------------------------------------------------------------------------------------------------|----------------------------------------------|----------------------------------------------------------------------------------------------|-------|-----------------------------------------------------------------------------------------------------------------------------------------------------------------------------------------------------------------------------------------------------------------------------------------------------------------------------------------------------------------------------------------------------------------------------------------------------------------------------------------------------------------------------------------------------------------------------------------------------------------------------------------------------------------------------------------------------------------------------------------------------------------------------------------------------------------------------------------------------------------------------------------------------------------------------------------------------------------------------------------------------------------------------------------------------------------------------------------------------------------------------------------------------------------------------------------------------------------------------------------------------------------------------------------------------------------------------------------------------------------------|
| CEREBELLUM                    | ncRNA and rRNA processing (1.840)            | GO:0034470 ncRNA processing<br>GO:0008033 tRNA processing<br>GO:0006399 tRNA metabolic process<br>GO:0034660 ncRNA metabolic process<br>GO:0022613 Ribonucleoprotein complex biogenesis                                                                                                                                                                                                                                                                                                                                     | 23<br>13<br>16<br>25<br>20                   | 1.41E-03<br>1.47E-03<br>3.72E-03<br>4.37E-03<br>9.33E-03                                     | 36    | ADAT3, AIMP1, ATXN2, CDK5RAP1, CDKN2A, EIF2AK4, ER1, EXOSC7, FARS2, GNL3L, INTS9, KRR1, LSM6, METTL1, NAF1, NIP7, NUFIP1, PHAX, PRMT5, PUS1, RPP14, RPP30, SF3A1, SF3A3, SLU7, TARBP2, TARSL2, TGS1, TRMT2B, TRMU, TRNT1, TSEN34, TYW1B, UTP14A, UTP6, WDR55                                                                                                                                                                                                                                                                                                                                                                                                                                                                                                                                                                                                                                                                                                                                                                                                                                                                                                                                                                                                                                                                                                          |
|                               | Phosphorylation (1.640)                      | GO:0006468 Protein amino acid phosphorylation<br>GO:0006796 Phosphate metabolic process<br>GO:0006793 Phosphorus metabolic process                                                                                                                                                                                                                                                                                                                                                                                          | 55<br>73<br>73                               | 9.73E-03<br>2.29E-02<br>2.29E-02                                                             | 74    | ABI3, AKAP9, ARAF, ATP6V1C1, ATR, AURKC, AXL, BRAF, BRD4, BTK, CAD, CAMK1D, CAV2, CDK13, CDK16, CDK3, CLK2, CLK4, EIF2AK4, EPHE2, EPM2A, ERCC3, FES, FPGT, GADD45G, GHR, GK, GLYCTK, GPD1, HIPK4, INPPL1, IP6K2, LRRK2, LTK, MAP3K4, MAP4K4, MAPK6, MAPK8, MAPKAPK5, MARK3, MASTL, MDFI, MERTK, MON2, MTM1, MTMR1, NDUFA6, NEK6, PASK, PDE6G, PKN3, PLK2, PNCK, PPM1A, PPM1D, PPP1CB, PPP6C, PRKD1, PRPF4B, PTP4A1, PTPN5, PTPRG, SHC1, STAT4, STK17A, STRADB, TESK1, TGFB1, THTPA, TIE1, TNIN3K, TP53RK, WNK4, WNT2                                                                                                                                                                                                                                                                                                                                                                                                                                                                                                                                                                                                                                                                                                                                                                                                                                                  |
|                               | Regulation of DNA binding (1.392)            | GO:0051098 Regulation of binding<br>GO:0051101 Regulation of DNA binding<br>GO:0051099 Positive regulation of binding<br>GO:0051090 Regulation of transcription factor activity                                                                                                                                                                                                                                                                                                                                             | 17<br>14<br>10<br>12                         | 1.75E-02<br>2.49E-02<br>3.83E-02<br>3.86E-02                                                 | 17    | ABRA, ATR, BRD4, CDKN2A, CREBZF, DPH3, ID1, MDFI, MTDH, NR0B1, NRG1, PYCARD, RHEBL1, SMARCA4, TGFB1, TLR3, UBE2N                                                                                                                                                                                                                                                                                                                                                                                                                                                                                                                                                                                                                                                                                                                                                                                                                                                                                                                                                                                                                                                                                                                                                                                                                                                      |
|                               | Peroxisome (1.299)                           | GO:0016558 Protein import into peroxisome matrix<br>GO:0006625 Protein targeting to peroxisome                                                                                                                                                                                                                                                                                                                                                                                                                              | 4<br>4                                       | 1.77E-02<br>4.50E-02                                                                         | 4     | PEX6, PEX13, PEX16, PEX26                                                                                                                                                                                                                                                                                                                                                                                                                                                                                                                                                                                                                                                                                                                                                                                                                                                                                                                                                                                                                                                                                                                                                                                                                                                                                                                                             |
|                               | Unfolded protein response (1.257)            | GO:0006984 ER-nuclear signaling pathway<br>GO:0034620 Cellular response to unfolded protein<br>GO:0030968 ER unfolded protein response<br>GO:0034976 Response to ER stress                                                                                                                                                                                                                                                                                                                                                  | 7<br>5<br>5<br>6                             | 1.50E-02<br>3.16E-02<br>3.16E-02<br>4.64E-02                                                 | 7     | ATG10, CRIPAK, DERL2, DERL3, EIF2AK4, ERO1L, VAPB                                                                                                                                                                                                                                                                                                                                                                                                                                                                                                                                                                                                                                                                                                                                                                                                                                                                                                                                                                                                                                                                                                                                                                                                                                                                                                                     |
|                               | Transcription (1.230)                        | GO:0045449 Regulation of transcription<br>GO:0006350 Transcription                                                                                                                                                                                                                                                                                                                                                                                                                                                          | 174<br>143                                   | 3.35E-02<br>3.40E-02                                                                         | 182   | ACTR5, AEBP2, AHCTF1, APOBEC3F, ARID2, ASF1A, ATAD2, ATF1, ATXN7, BARHL1, BMP4, BRPF1, BRWD1, CAND1, CAND2, CARHSP1, CBF2A2T3, CDC47L, CDKN2A, CNOT3, CNOT6, COPS2, CRABP2, CREB3L4, CREBZF, CRK, CRX, CTNNB1, ELL2, ELL3, EMX1, ERCC3, ESR2, FHL2, FOXP1, GATAD1, GTF2E2, GTF3C5, HAT1, HDAC10, HDAC3, HIF3A, HOMEZ, ID1, IGSF1, IRAK1BP1, IRX2, IVNS1ABP, KCNH6, KDM5A, KIAA2018, KLF10, LBX1, LIMD1, MAF, MBD1, MBD2, MCM5, MDFI, MED24, MED6, MLF1, MNAT1, MTDH, MURC, MXD3, MYC, MYCBP, MYEF2, MYNN, NAA15, NFATC2IP, NFX1, NFYB, NR0B1, NRG1, NTF3, NUFIP1, PASK, PAX2, PGBD1, PHF19, POLR1B, POU2F1, PPARA, PPM1A, PPP1R13L, PPRC1, PRDM8, PRMT5, PSPC1, PYCARD, RARB, RASD1, RBPJ, RCOR2, RHEBL1, RING1, RQCD1, Rragc, SAP130, SAP30L, SLC11A1, SMAD6, SMARCA4, SMARCE1, SMURF2, SOHLH1, SORBS3, SPI1, SRA1, STAT4, SUV39H2, TAF11, TAF1A, TARBP2, TCF19, TFAM, TFPC2, TGFB1, TGS1, TIAL1, TLR3, TMF1, TRAK2, TRIM16, TRIP4, UBE2N, WHSC1, WHSC1L1, WNT1, WWP1, ZBTB8A, ZFP14, ZFX, ZIK1, ZIM2, ZNF107, ZNF132, ZNF154, ZNF19, ZNF223, ZNF230, ZNF250, ZNF316, ZNF329, ZNF419, ZNF426, ZNF43, ZNF467, ZNF473, ZNF486, ZNF524, ZNF546, ZNF548, ZNF551, ZNF552, ZNF555, ZNF566, ZNF568, ZNF577, ZNF585A, ZNF593, ZNF611, ZNF619, ZNF623, ZNF626, ZNF655, ZNF669, ZNF670, ZNF682, ZNF692, ZNF76, ZNF775, ZNF790, ZNF814, ZNF818P, ZNF827, ZNF846, ZNF852, ZSCAN1 |
|                               | Transcription (2.640)                        | GO:0006355 Regulation of transcription, DNA-depend<br>GO:0051252 Regulation of RNA metabolic process<br>GO:0045449 Regulation of transcription<br>GO:0006350 Transcription                                                                                                                                                                                                                                                                                                                                                  | 92<br>92<br>120<br>97                        | 4.95E-04<br>1.02E-03<br>4.64E-03<br>1.18E-02                                                 | 129   | ANKRD1, ARNTL2, ASXL3, ATF1, ATF3, ATF7, BARX2, BATF, BATF3, BLM, BRCA2, CBF2A2T2, CBF2A2T3, CBX2, CDC73, CIITA, DLX2, DNMT3A, DNMT3B, DPF3, E2F7, EHF, ELF5, ERCC3, FOXN4, FOXP3, GATA6, GATAD2B, GLRX2, GMCL1, GMCL1L, GMEB1, GSX1, GTF3C3, HAT1, HCFC2, HES4, HIC1, HMG2A, HNF4A, HSF2BP, HSF4, IGSF1, IL16, ING5, IRAK3, IRX3, IRX6, ISL2, KHDRBS1, KRTAP1-1, MED14, MED18, MIER1, MOV10, MTF1, MYBL2, MYT1, NAA16, NEUROG3, NFATC1, NFATC2, NHLH1, NKX2-1, NKX2-8, NPAS2, NTF3, ONECUT1, OSM, PAPOLG, PAX1, PER3, PEX14, PKNOX1, POLR1A, POUZAF1, POU3F4, PRDM16, PROX2, RCOR3, RUNX1, SKI, SLA2, SOX13, SOX3, SOX5, SOX6, SP6, STAT6, TAF1A, TARBP1, TBX5, TCF7L1, TEAD4, TFB2M, TGFBRAP1, UBC, VDR, VGLL1, ZFP92, ZGLP1, ZNF180, ZNF20, ZNF200, ZNF208, ZNF230, ZNF235, ZNF281, ZNF334, ZNF345, ZNF347, ZNF460, ZNF480, ZNF492, ZNF524, ZNF547, ZNF568, ZNF573, ZNF582, ZNF600, ZNF674, ZNF676, ZNF701, ZNF849P, ZNF98, ZNHIT3, ZSCAN18, ZSCAN2, ZZZ3                                                                                                                                                                                                                                                                                                                                                                                                          |
|                               | Positive regulation of transcription (1.614) | GO:0045944 Positive regulation of transcription from RNA polymerase II promoter<br>GO:0045893 Positive regulation of transcription, DNA-dependent<br>GO:0006357 Regulation of transcription from RNA polymerase II promoter<br>GO:0051254 Positive regulation of RNA metabolic process<br>GO:0010628 Positive regulation of gene expression<br>GO:0045941 Positive regulation of transcription<br>GO:0031328 Positive regulation of cellular biosynthetic process<br>GO:0009891 Positive regulation of biosynthetic process | 26<br>29<br>40<br>29<br>33<br>32<br>36<br>36 | 2.64E-03<br>9.98E-03<br>1.13E-02<br>1.14E-02<br>1.47E-02<br>1.67E-02<br>3.09E-02<br>3.62E-02 | 50    | ANKRD1, APOA5, AVPR1A, BARX2, BLM, CBX2, CD3E, CIITA, DLX2, DNMT3A, DNMT3B, EHF, ERCC3, FOXP3, GATA6, GSX1, HCFC2, HNF4A, HSF4, ING5, MED14, MED18, MTF1, NAA16, NEUROG3, NFATC2, NKX2-1, NPAS2, NTF3, ONECUT1, OSM, P2RX4, PAX1, PKNOX1, PRDM16, RUNX1, SKI, SLA2, SOX5, SOX6, STAT6, TARBP1, TBX5, TCF7L1, TEAD4, UBC, VDR, ZGLP1, ZNF281, ZNF345                                                                                                                                                                                                                                                                                                                                                                                                                                                                                                                                                                                                                                                                                                                                                                                                                                                                                                                                                                                                                   |
|                               | Amino acid biogenesis (1.505)                | GO:0042401 Biogenic amine biosynthetic process<br>GO:0042398 Cellular amino acid derivative biosynthetic process<br>GO:0009309 Amine biosynthetic process<br>GO:0006575 Cellular amino acid derivative metabolic process                                                                                                                                                                                                                                                                                                    | 7<br>9<br>9<br>12                            | 6.68E-04<br>7.37E-04<br>9.64E-03<br>4.26E-02                                                 | 14    | AANAT, AGMAT, DNMT3B, ETKN2, GCLM, GGT7, GLRX2, HDC, NAGS, PAH, PLA2G5, SHMT1, TH, TMLHE                                                                                                                                                                                                                                                                                                                                                                                                                                                                                                                                                                                                                                                                                                                                                                                                                                                                                                                                                                                                                                                                                                                                                                                                                                                                              |

**Supplementary Table 10** Top biological processes from gene ontology analyses of transcripts with APA usage in sALS

|                               | Cluster ID<br>(Enrichment score)                    | GO term ID                                            | Count    | P value  | Total genes in<br>cluster | Genes                                                                                                                                                                                                                                                                                                                                                                                                                                                                                                                                                                                                                                                                                                                                                                                                                                                                                                                                                                                                                                                                                                                                           |
|-------------------------------|-----------------------------------------------------|-------------------------------------------------------|----------|----------|---------------------------|-------------------------------------------------------------------------------------------------------------------------------------------------------------------------------------------------------------------------------------------------------------------------------------------------------------------------------------------------------------------------------------------------------------------------------------------------------------------------------------------------------------------------------------------------------------------------------------------------------------------------------------------------------------------------------------------------------------------------------------------------------------------------------------------------------------------------------------------------------------------------------------------------------------------------------------------------------------------------------------------------------------------------------------------------------------------------------------------------------------------------------------------------|
| CEREBELLUM                    | Response to oxidative stress<br>(1.368)             | GO:0010035 Response to inorganic substance            | 13       | 3.01E-02 | 17                        | ADA, CCL5, CYP11A1, EPX, GLRX2, KCNMA1, MAPK8, NEIL1, PARK7, PEF1, PYCR1, RYR2, S100A16, SLC25A12, STK25, TPM1, UCP3                                                                                                                                                                                                                                                                                                                                                                                                                                                                                                                                                                                                                                                                                                                                                                                                                                                                                                                                                                                                                            |
|                               |                                                     | GO:0000302 Response to reactive oxygen species        | 7        | 3.12E-02 |                           |                                                                                                                                                                                                                                                                                                                                                                                                                                                                                                                                                                                                                                                                                                                                                                                                                                                                                                                                                                                                                                                                                                                                                 |
|                               |                                                     | GO:0006979 Response to oxidative stress               | 11       | 3.57E-02 |                           |                                                                                                                                                                                                                                                                                                                                                                                                                                                                                                                                                                                                                                                                                                                                                                                                                                                                                                                                                                                                                                                                                                                                                 |
|                               | Peroxisome (1.235)                                  | GO:0007031 Peroxisome organization                    | 4        | 3.48E-02 | 4                         | PEX14, PEX16, PEX19, SCP2                                                                                                                                                                                                                                                                                                                                                                                                                                                                                                                                                                                                                                                                                                                                                                                                                                                                                                                                                                                                                                                                                                                       |
| CEREBELLUM                    | Response to substance (1.063)                       | GO:0010035 Response to inorganic substance            | 13       | 3.01E-02 | 13                        | ADA, CYP11A1, EPX, GLRX2, KCNMA1, MAPK8, PARK7, PEF1, RYR2, S100A16, SLC25A12, TPM1, UCP3                                                                                                                                                                                                                                                                                                                                                                                                                                                                                                                                                                                                                                                                                                                                                                                                                                                                                                                                                                                                                                                       |
|                               |                                                     | GO:0045017 Glycerolipid biosynthetic process          | 9        | 3.72E-03 | 10                        | AGPAT3, ALG9, DGAT2, FABP3, PCK1, PEMT, PI4KB, PIGN, PIGS, PLAUR                                                                                                                                                                                                                                                                                                                                                                                                                                                                                                                                                                                                                                                                                                                                                                                                                                                                                                                                                                                                                                                                                |
|                               | GO:0046474 Glycerophospholipid biosynthetic process | 7                                                     | 2.04E-02 |          |                           |                                                                                                                                                                                                                                                                                                                                                                                                                                                                                                                                                                                                                                                                                                                                                                                                                                                                                                                                                                                                                                                                                                                                                 |
|                               | GO:0046489 Phosphoinositide biosynthetic process    | 5                                                     | 3.68E-02 |          |                           |                                                                                                                                                                                                                                                                                                                                                                                                                                                                                                                                                                                                                                                                                                                                                                                                                                                                                                                                                                                                                                                                                                                                                 |
| Lipid biosynthesis (0.985)    | GO:0008654 Phospholipid biosynthetic process        | 8                                                     | 4.29E-02 |          |                           |                                                                                                                                                                                                                                                                                                                                                                                                                                                                                                                                                                                                                                                                                                                                                                                                                                                                                                                                                                                                                                                                                                                                                 |
| FRONTAL CORTEX                | Transcription (1.594)                               | GO:0006350 Transcription                              | 126      | 1.06E-02 | 154                       | AFAP1L2, AHCTF1, APBB1, AR, ARID4A, ARX, ASXL3, ATF1, ATF3, BARX2, BATF, BAZ1A, BHLHA9, BMP4, BRCA2, BTG2, CALCOCO1, CASK, CBFA2T3, CBF, CBX4, CDC73, CEBPB, CHD5, CIR1, CRK, DNMT3A, DNMT3B, EDA2R, ELF5, ERCC3, ESR2, ESRRB, FOXN4, FOXP3, GABPB1, GATA3, GMCL1, GMEB1, GPBP1L1, GSX1, GTF2H1, HELLS, HES4, HIPK3, HMGNS, HNF1A, HNRNP, HOXB6, HTATIP2, IFI16, IGSF1, IKZF5, ING5, IRAK3, IRX3, KDM3A, KHDRBS1, KLF5, LIF, MAP2K3, MAX, MCM8, MEAF6, MED6, MMS19, MYCBP2, NEDD4, NEO1, NFATC2, NKX2-1, OLIG2, ONECUT1, OSM, PAPOLG, PATZ1, PAWR, PAX3, PDE8A, PDLIM1, POLR1A, POLR1B, POU3F4, PRDM16, RBL2, RNF6, RUNX1, RXRG, SCML1, SCML2, SMARCD1, SNIP1, SOHLH2, SP100, SP6, STAT4, TAF1A, TBX5, TCEB3, TCF7L1, TFAP2C, TFB2M, TGFBRAP1, THAP7, TLE3, TRIM33, TROVE2, TSPYL2, VAX1, VGLL1, WT1, XBP1, YY1, ZBTB1, ZBTB17, ZBTB40, ZFP92, ZGLP1, ZNF124, ZNF175, ZNF195, ZNF208, ZNF235, ZNF254, ZNF26, ZNF286A, ZNF329, ZNF347, ZNF358, ZNF396, ZNF43, ZNF431, ZNF460, ZNF486, ZNF514, ZNF519, ZNF527, ZNF547, ZNF568, ZNF573, ZNF600, ZNF611, ZNF665, ZNF670, ZNF674, ZNF676, ZNF687, ZNF69, ZNF708, ZNF8, ZNF837, ZNHIT3, ZSCAN5B, ZZZ3 |
|                               |                                                     | GO:0006355 Regulation of transcription, DNA-dependent | 105      | 2.85E-02 |                           |                                                                                                                                                                                                                                                                                                                                                                                                                                                                                                                                                                                                                                                                                                                                                                                                                                                                                                                                                                                                                                                                                                                                                 |
|                               |                                                     | GO:0051252 Regulation of RNA metabolic process        | 106      | 3.69E-02 |                           |                                                                                                                                                                                                                                                                                                                                                                                                                                                                                                                                                                                                                                                                                                                                                                                                                                                                                                                                                                                                                                                                                                                                                 |
|                               |                                                     | GO:0045449 Regulation of transcription                | 147      | 3.80E-02 |                           |                                                                                                                                                                                                                                                                                                                                                                                                                                                                                                                                                                                                                                                                                                                                                                                                                                                                                                                                                                                                                                                                                                                                                 |
| FRONTAL CORTEX                | Neuron differentiation (1.594)                      | GO:0030182 Neuron differentiation                     | 35       | 5.56E-03 | 48                        | AFG3L2, APBB1, ARX, B3GNT2, BCL2, BMP4, BTG2, CCL4, CD24, CDC42BPB, CDH1, CEBPB, CXCR4, DOCK7, DSCAM, DSCAML1, EFNA1, ESRRB, FOXN4, GSX1, KLF5, LIF, LIMS1, LPAR3, MCOLN3, MTOR, MYCBP2, NEDD4, NFASC, NKX2-1, NRP2, NTRK3, OLIG2, ONECUT1, PARD6B, PAX3, POU3F4, RET, ROCK1P1, SCARF1, SHROOM4, SLITRK4, SNAP25, STRN, TTC8, UPK3A, VANGL2, VAX1                                                                                                                                                                                                                                                                                                                                                                                                                                                                                                                                                                                                                                                                                                                                                                                               |
|                               |                                                     | GO:0030030 Cell projection organization               | 29       | 1.44E-02 |                           |                                                                                                                                                                                                                                                                                                                                                                                                                                                                                                                                                                                                                                                                                                                                                                                                                                                                                                                                                                                                                                                                                                                                                 |
|                               |                                                     | GO:0031175 Neuron projection development              | 22       | 1.48E-02 |                           |                                                                                                                                                                                                                                                                                                                                                                                                                                                                                                                                                                                                                                                                                                                                                                                                                                                                                                                                                                                                                                                                                                                                                 |
|                               |                                                     | GO:0048858 Cell projection morphogenesis              | 20       | 3.29E-02 |                           |                                                                                                                                                                                                                                                                                                                                                                                                                                                                                                                                                                                                                                                                                                                                                                                                                                                                                                                                                                                                                                                                                                                                                 |
| GO:0000902 Cell morphogenesis |                                                     | 26                                                    | 4.55E-02 |          |                           |                                                                                                                                                                                                                                                                                                                                                                                                                                                                                                                                                                                                                                                                                                                                                                                                                                                                                                                                                                                                                                                                                                                                                 |
| FRONTAL CORTEX                | Germ cell development (1.225)                       | GO:0032990 Cell part morphogenesis                    | 20       | 4.78E-02 | 13                        | AXIN1, BCL2, BMP4, BRCA2, CXCR4, MOV10L1, MTOR, PDE3A, SOHLH2, TDRD1, TSSK6, WT1, ZGLP1                                                                                                                                                                                                                                                                                                                                                                                                                                                                                                                                                                                                                                                                                                                                                                                                                                                                                                                                                                                                                                                         |
|                               |                                                     | GO:0007281 Germ cell development                      | 12       | 1.05E-02 |                           |                                                                                                                                                                                                                                                                                                                                                                                                                                                                                                                                                                                                                                                                                                                                                                                                                                                                                                                                                                                                                                                                                                                                                 |
|                               |                                                     | GO:0048599 Oocyte development                         | 5        | 1.77E-02 |                           |                                                                                                                                                                                                                                                                                                                                                                                                                                                                                                                                                                                                                                                                                                                                                                                                                                                                                                                                                                                                                                                                                                                                                 |
|                               |                                                     | GO:0009994 Oocyte differentiation                     | 5        | 2.08E-02 |                           |                                                                                                                                                                                                                                                                                                                                                                                                                                                                                                                                                                                                                                                                                                                                                                                                                                                                                                                                                                                                                                                                                                                                                 |
| FRONTAL CORTEX                | Reproductive process (1.192)                        | GO:0048477 Oogenesis                                  | 6        | 3.69E-02 | 24                        | ACR, AR, AXIN1, BCL2, BMP4, BMPR1A, BRCA2, CXCR4, FGF9, HNF1A, IDH1, INSL3, LIF, MOV10L1, MTOR, NKX2-1, PDE3A, PIWIL4, PTGDR, SYCP2, TDRD1, TSSK6, WT1, ZGLP1                                                                                                                                                                                                                                                                                                                                                                                                                                                                                                                                                                                                                                                                                                                                                                                                                                                                                                                                                                                   |
|                               |                                                     | GO:0007281 Germ cell development                      | 12       | 1.05E-02 |                           |                                                                                                                                                                                                                                                                                                                                                                                                                                                                                                                                                                                                                                                                                                                                                                                                                                                                                                                                                                                                                                                                                                                                                 |
|                               |                                                     | GO:0003006 Reproductive developmental process         | 22       | 1.88E-02 |                           |                                                                                                                                                                                                                                                                                                                                                                                                                                                                                                                                                                                                                                                                                                                                                                                                                                                                                                                                                                                                                                                                                                                                                 |
| FRONTAL CORTEX                | Chromatin regulation (1.078)                        | GO:0048610 Reproductive cellular process              | 15       | 2.84E-02 | 5                         | DNMT3A, DNMT3B, HELLS, PIWIL4, TDRD1                                                                                                                                                                                                                                                                                                                                                                                                                                                                                                                                                                                                                                                                                                                                                                                                                                                                                                                                                                                                                                                                                                            |
|                               |                                                     | GO:0006346 Methylation-dependent chromatin silencing  | 3        | 2.18E-02 |                           |                                                                                                                                                                                                                                                                                                                                                                                                                                                                                                                                                                                                                                                                                                                                                                                                                                                                                                                                                                                                                                                                                                                                                 |
|                               |                                                     | GO:0006305 DNA alkylation                             | 5        | 2.79E-02 |                           |                                                                                                                                                                                                                                                                                                                                                                                                                                                                                                                                                                                                                                                                                                                                                                                                                                                                                                                                                                                                                                                                                                                                                 |
|                               |                                                     | GO:0006306 DNA methylation                            | 5        | 2.79E-02 |                           |                                                                                                                                                                                                                                                                                                                                                                                                                                                                                                                                                                                                                                                                                                                                                                                                                                                                                                                                                                                                                                                                                                                                                 |

**Supplementary Table 11** Human gene information, chromosomal location and primers used for qRT-PCR

|                    | Gene                        | RefSeq                                                         | Forward primer              | Reverse primer               |
|--------------------|-----------------------------|----------------------------------------------------------------|-----------------------------|------------------------------|
| Expression         | <i>ALAS2</i>                | NM_000032.4; NM_001037968.3; NM_001037967.3                    | AGGGGCTTCCTGTCATC           | CAGAGCTTGCTGTTGAGTGC         |
|                    | <i>CHI3L1</i>               | NM_001276.2                                                    | CCCAACCTGAAGACTCTCTTGT      | GGTGTGGAGGCTATCTTGG          |
|                    | <i>DNAJB1</i>               | NM_006145.2; NM_001300914.1                                    | GGCCTACGACGTGCTCAG          | GTGTAGCTGAAAAGAGGTACCAATTG   |
|                    | <i>FOXJ1</i>                | NM_001454.3                                                    | GGGGTGGGAGCAACTTCT          | CCTCCTCCGAATAAGTATGTGGT      |
|                    | <i>HMOX1</i>                | NM_002133.2                                                    | GGCAGAGGGTGATAGAAGAGG       | AGCTCCTGCAACTCCTCAAA         |
|                    | <i>HSPB1</i>                | NM_001540.3                                                    | TCCCTGGATGTCAACCACTT        | GATGTAGCCATGCTCGTCT          |
|                    | <i>HSPA1A</i>               | NM_005345.5                                                    | CGGCAAGGTGGAGATCAT          | GGTGTCTGCGGGTTCAG            |
|                    | <i>HSPA1B</i>               | NM_005346.4                                                    | AAGGGTGTTCCTCCCTTT          | TAGTGTTCGCAAGCAAA            |
|                    | <i>HSPH1</i>                | NM_006644.3; NM_001286503.1;<br>NM_001286504.1; NM_001286505.1 | AGCTGTGTGGACCATATGAAAA      | TTGTCAACATATGCTTGTTTAGCTT    |
|                    | <i>RAB39A</i>               | NM_017516.1                                                    | CGGCGTGGACTTCTTCTC          | TGCGGTAATAAGATCGGGTTAT       |
|                    | <i>SERPINA3</i>             | NM_001085.4                                                    | ACTCCAGACAGACGGCTTTG        | ATTCTCTCCATTCTCAACTCTGC      |
|                    | <i>SERPINH1</i>             | NM_001207014.1; NM_001235.3                                    | GGTGGAGGTGACCCATGA          | CTTGCAATGGCCTCAGTCA          |
|                    | <i>SPR</i>                  | NM_003124.4                                                    | GCTCGTATATGCTGTTCCA         | GCATGTCTGTGTCAGAGGA          |
|                    | <i>SQRDL</i>                | NM_021199.3; NM_001271213.1                                    | TACGTCAAAGACCCTGCT          | ACAGAAATTGCTCTATCAAGTATTCCT  |
|                    | <i>TTR</i>                  | NM_000371.3                                                    | GCCGTGCATGTGTTTCCAGA        | GCTCTCCAGACTCACTGGTTTT       |
| Cassette exon      | Gene                        | Chromosomal location (GRCh37/hg19)                             | Forward primer              | Reverse primer               |
|                    | <i>ACTN1</i>                | chr14:69,345,175-69,345,240                                    | ATGGGTTACAACATGGGAGAAGC     | AAGTCAATGAAGGCCTGGAATGTC     |
|                    | <i>ANKRD12</i>              | chr18:9,204,474-9,204,542                                      | TTACTATTAGCCCATCAAGAAATGAAG | TATGTCTGGATCTGAATCTGTGTC     |
|                    | <i>ATXN2</i>                | chr12:111,902,466-111,902,519                                  | ATGATGCACCCAGCGTCAGC        | CCTTGTGTATGGTAATTTGGGACATG   |
|                    | <i>DGCR6L</i>               | chr22:20,303,642-20,303,742                                    | CGCCTACAGAACGAGCACCAGTG     | GTGTTCCACGGCCTCTAGTTCTCG     |
|                    | <i>HIF1A</i>                | chr14:62,212,409-62,212,535                                    | ATTGGAACATTATTACAGCAGCCAGAC | AGTCTACATGCTAAATCAGAGGGTATTA |
|                    | <i>MAPT</i>                 | chr17:44,087,676-44,087,768                                    | AGGCGGGAAGGTGCAAATAG        | TCCTGGTTTATGATGGATGTT        |
|                    | <i>MARK2</i>                | chr11:63,675,732-63,675,776                                    | AGACCGAGTGGAGACGCTCAGACC    | CTTGGCCTCCCAGAAATTCCTT       |
|                    | <i>MRPS31</i>               | chr13:41,328,155-41,328,228                                    | GCCAGGAGAAGACGGATGAT        | GTCTGTTTCAGGTGCTTCTTAGTAAC   |
|                    | <i>PARP6</i>                | chr15:72,543,186-72,543,295                                    | CCTGCCAAGGAGGCTCGGTTCC      | GGGACCCATGGAAGGCAAAGGTG      |
|                    | <i>PAX6</i>                 | chr11:31,823,419-31,823,460                                    | GAGCCAGCATGCAGAACAGTCACA    | ACTTTTGCATCTGCATGGGTCTGC     |
|                    | <i>RBM39</i>                | chr20:34,317,384-34,317,449                                    | GGCCGCTACAGAAGTCTTACTCC     | ACCCAATCTTCTCGGATGG          |
|                    | <i>U2AF1</i>                | chr21:44,520,563-44,520,630                                    | TGACGGTTTGCCTGTGCC          | CCTCACGGCGAAACTTGAC          |
|                    | <i>ULK3</i>                 | chr15:75,130,493-75,130,533                                    | GCGGGAGCTGCTTCACACTGAGGT    | AAGTATTCAGCTCGGGCCATGAGGTTCT |
| <i>ZMYND8</i>      | chr20:45,841,287-45,841,370 | TACCCCGCCAGAAGTACCATTCC                                        | TCTTTCGGGAGGAGGCTCTTCGTG    |                              |
| Endogenous control | Gene                        | RefSeq                                                         | Forward primer              | Reverse primer               |
| <i>RPLPO</i>       | NM_001002.3; NM_053275.3    | TCTACAACCCTGAAGTGCTTGAT                                        | CAATCTGCAGACAGACACTGG       |                              |
